# Supplementary material
Source: MDPI journal article supplement (https://www.mdpi.com/2311-5637/8/1/14)
Supplement: s1 [file s1]

|                    | <i>Candida</i> |       |                     | <i>Trichosporon</i> |       |                    | <i>Debaryomyces</i> |       |                    | <i>Kluyveromyces</i> |       |                     | <i>Geotrichum/Galactomyces</i> |       |                     |
|--------------------|----------------|-------|---------------------|---------------------|-------|--------------------|---------------------|-------|--------------------|----------------------|-------|---------------------|--------------------------------|-------|---------------------|
| Factors tested     | Df             | F     | p                   | Df                  | F     | p                  | Df                  | F     | p                  | Df                   | F     | p                   | Df                             | F     | p                   |
| Strains inhibition | 6              | 46.52 | 0.001               | 3                   | 41.92 | 0.001              | 3                   | 47.21 | 0.001              | 4                    | 92.56 | 0.001               | 4                              | 62.97 | 0.001               |
| pH                 | 1              | 8.74  | 0.003               | 1                   | 75.79 | 0.001              | 1                   | 75.79 | 0.001              | 1                    | 0.91  | 0.76 <sup>ns</sup>  | 1                              | 24.98 | 0.001               |
| Lactic acid        | 1              | 2.27  | 0.132 <sup>ns</sup> | 1                   | 5.86  | 0.001              | 1                   | 0.45  | 0.52 <sup>ns</sup> | 1                    | 6.03  | 0.01                | 1                              | 4.175 | 0.041               |
| Acetic acid        | 1              | 4.31  | 0.038               | 1                   | 4.20  | 0.041              | 1                   | 2.21  | 0.14 <sup>ns</sup> | 1                    | 2.21  | 0.012               | 1                              | 0.69  | 0.410 <sup>ns</sup> |
| Bacteriocine genes | 1              | 50.58 | 0.001               | 1                   | 22.2  | 0.001              | 1                   | 5.54  | 0.02               | 1                    | 12.86 | 0.001               | 1                              | 25.74 | 0.001               |
| Chitinase genes    | 1              | 0.24  | 0.62 <sup>ns</sup>  | 1                   | 2.92  | 0.09 <sup>ns</sup> | 1                   | 6.21  | 0.013              | 1                    | 0.185 | 0.667 <sup>ns</sup> | 1                              | 3.84  | 0.051 <sup>ns</sup> |

| Parameters for yeast models | <i>Candida</i> |        |       | <i>Trichosporon</i> |       |       | <i>Debaryomyces</i> |       |       | <i>Kluyveromyces</i> |       |       | <i>Geotrichum/Galactomyces</i> |       |       |
|-----------------------------|----------------|--------|-------|---------------------|-------|-------|---------------------|-------|-------|----------------------|-------|-------|--------------------------------|-------|-------|
|                             | R              | F      | p     | R                   | F     | p     | R                   | F     | p     | R                    | F     | p     | R                              | F     | p     |
|                             | 0.84           | 114.91 | 0.001 | 0.85                | 77.13 | 0.001 | 0.86                | 85.91 | 0.001 | 0.723                | 47.83 | 0.001 | 0.723                          | 37.09 | 0.001 |

**Table S1** The factorial analysis within the yeast genera. The categorical predictors - functional properties of *L. plantarums* strains are employed as covariates. The variability in inhibition is based on logarithm of index scale value for overlay method. ANCOVA,  $p \leq 0.05$ , Statistica Software v. 12.1. The index letters **ns** means – nonsignificant differences.

| Factors tested     | <i>Candida</i> |       |                     | <i>Trichosporon</i> |        |                     | <i>Debaryomyces</i> |       |                     | <i>Kluyveromyces</i> |       |                     | <i>Geotrichum/Galactomyces</i> |       |                     |
|--------------------|----------------|-------|---------------------|---------------------|--------|---------------------|---------------------|-------|---------------------|----------------------|-------|---------------------|--------------------------------|-------|---------------------|
|                    | Df             | F     | p                   | Df                  | F      | p                   | Df                  | F     | p                   | Df                   | F     | p                   | Df                             | F     | p                   |
| Strains inhibition | 6              | 36.52 | 0.001               | 3                   | 31.46  | 0.001               | 3                   | 63.47 | 0.001               | 4                    | 1.79  | 0.13 <sup>ns</sup>  | 4                              | 39.83 | 0.001               |
| pH                 | 1              | 7.51  | 0.007               | 1                   | 77     | 0.001               | 1                   | 47.42 | 0.001               | 1                    | 8.40  | 0.004               | 1                              | 0.32  | 0.857 <sup>ns</sup> |
| Lactic acid        | 1              | 3.54  | 0.497 <sup>ns</sup> | 1                   | 0.63   | 0.425 <sup>ns</sup> | 1                   | 0.45  | 0.500 <sup>ns</sup> | 1                    | 0.20  | 0.87 <sup>ns</sup>  | 1                              | 0.90  | 0.342 <sup>ns</sup> |
| Acetic acid        | 1              | 7.00  | 0.339 <sup>ns</sup> | 1                   | 8.00   | 0.001               | 1                   | 2.221 | 0.135 <sup>ns</sup> | 1                    | 0.34  | 0.56 <sup>ns</sup>  | 1                              | 0,69  | 0,410 <sup>ns</sup> |
| Bacteriocine genes | 1              | 19.85 | 0.001               | 1                   | 121.82 | 0.001               | 1                   | 6.01  | 0.015               | 1                    | 35.53 | 0.001               | 1                              | 70.73 | 0.001               |
| Chitinase genes    | 1              | 0.244 | 0.83 <sup>ns</sup>  | 1                   | 15.24  | 0.001               | 1                   | 6.21  | 0.013               | 1                    | 0.22  | 0.630 <sup>ns</sup> | 1                              | 0.38  | 0.38 <sup>ns</sup>  |

| Parameters for yeast models | <i>Candida</i> |       |       | <i>Trichosporon</i> |       |       | <i>Debaryomyces</i> |       |       | <i>Kluyveromyces</i> |      |       | <i>Geotrichum/Galactomyces</i> |       |       |
|-----------------------------|----------------|-------|-------|---------------------|-------|-------|---------------------|-------|-------|----------------------|------|-------|--------------------------------|-------|-------|
|                             | R              | F     | p     | R                   | F     | p     | R                   | F     | p     | R                    | F    | p     | R                              | F     | p     |
|                             | 0.83           | 25.76 | 0.001 | 0.73                | 37.13 | 0.001 | 0.71                | 31.45 | 0.001 | 0.366                | 1.87 | 0.009 | 0.75                           | 34.59 | 0.001 |

**Table S2** The factorial analysis within the yeast genera. The categorical predictors - functional properties of lactobacili in milk matrice are employed as covariates. The variability in the inhibition is based on the averages of yeast colony (mm) on modified overlay method with skimmed milk. ANCOVA,  $p \leq 0.05$ , Statistica Software v. 12.1. The index letters ns means – nonsignificant differences.

**Table S3** The interactions among *L. plantarum* strains and yeast strains based on the logarithm of index scale value by mean, standard deviation (s.d.) and standard error of means (s.e.m.). The data resulted from Factorial ANOVA, Statistica 12v., Significant at  $\alpha \leq 0.05$ .

| <i>L. plantarum</i><br>strains | yeast                                | mean     | s.d.     | s.e.m.   |
|--------------------------------|--------------------------------------|----------|----------|----------|
| 191                            | <i>Candida krusei</i> 600            | 0,231049 | 0,400189 | 0,231049 |
|                                | <i>C. inconspicua</i> 601            | 0,231049 | 0,400189 | 0,231049 |
|                                | <i>C. parapsilosis</i> 612           | 1,609438 | 0,000000 | 0,000000 |
|                                | <i>C. intermedia</i> 622             | 1,730986 | 0,105263 | 0,060774 |
|                                | <i>C. apicola</i> 620                | 1,894527 | 0,088999 | 0,051384 |
|                                | <i>C. zeylanoides</i> 623            | 0,828302 | 0,234095 | 0,135155 |
|                                | <i>C. atlantica</i> 611              | 1,894527 | 0,088999 | 0,051384 |
|                                | <i>Trichosporon asahii</i> 624       | 1,670212 | 0,105263 | 0,060774 |
|                                | <i>T. domesticum</i> 1062            | 1,730986 | 0,105263 | 0,060774 |
|                                | <i>T. coremiiforme</i> 607           | 1,535057 | 0,128832 | 0,074381 |
|                                | <i>T. coremiiforme</i> 608           | 1,595831 | 0,203075 | 0,117245 |
|                                | <i>Debaryomyces subglobosus</i> 2027 | 1,945910 | 0,000000 | 0,000000 |
|                                | <i>D. hansenii</i> 742               | 0,000000 | 0,000000 | 0,000000 |
|                                | <i>D. hansenii</i> 615               | 1,290400 | 0,166093 | 0,095894 |
|                                | <i>D. hansenii</i> 47                | 1,945910 | 0,000000 | 0,000000 |
|                                | <i>Kluyveromyces lactis</i> 1054     | 1,194506 | 0,166093 | 0,095894 |
|                                | <i>K. lactis</i> 617                 | 0,462098 | 0,400189 | 0,231049 |
|                                | <i>K. marxianus</i> 620              | 0,828302 | 0,234095 | 0,135155 |
|                                | <i>K. marxianus</i> 270              | 0,000000 | 0,000000 | 0,000000 |
|                                | <i>K. marxianus</i> 258              | 0,000000 | 0,000000 | 0,000000 |
|                                | <i>Geotrichum candidum</i> 878       | 1,535057 | 0,128832 | 0,074381 |
|                                | <i>G. candidum</i> 870               | 1,670212 | 0,105263 | 0,060774 |
|                                | <i>G. candidum</i> 832               | 0,693147 | 0,000000 | 0,000000 |
|                                | <i>G. candidum</i> 1053              | 0,231049 | 0,400189 | 0,231049 |
|                                | <i>G. candidum</i> 1061              | 0,000000 | 0,000000 | 0,000000 |
| 196                            | <i>Candida krusei</i> 600            | 0,231049 | 0,400189 | 0,231049 |
|                                | <i>C. inconspicua</i> 601            | 0,231049 | 0,400189 | 0,231049 |
|                                | <i>C. parapsilosis</i> 612           | 1,730986 | 0,105263 | 0,060774 |
|                                | <i>C. intermedia</i> 622             | 1,730986 | 0,105263 | 0,060774 |
|                                | <i>C. apicola</i> 620                | 1,843143 | 0,088999 | 0,051384 |
|                                | <i>C. zeylanoides</i> 623            | 0,963457 | 0,234095 | 0,135155 |
|                                | <i>C. atlantica</i> 611              | 1,843143 | 0,088999 | 0,051384 |
|                                | <i>Trichosporon asahii</i> 624       | 1,945910 | 0,000000 | 0,000000 |
|                                | <i>T. domesticum</i> 1062            | 1,782369 | 0,168433 | 0,097245 |
|                                | <i>T. coremiiforme</i> 607           | 1,535057 | 0,128832 | 0,074381 |
|                                | <i>T. coremiiforme</i> 608           | 1,730986 | 0,105263 | 0,060774 |
|                                | <i>Debaryomyces subglobosus</i> 2027 | 1,945910 | 0,000000 | 0,000000 |
|                                | <i>D. hansenii</i> 742               | 0,000000 | 0,000000 | 0,000000 |
|                                | <i>D. hansenii</i> 615               | 1,194506 | 0,166093 | 0,095894 |

|     |                                      |          |          |          |
|-----|--------------------------------------|----------|----------|----------|
|     | <i>D. hansenii</i> 47                | 1,945910 | 0,000000 | 0,000000 |
|     | <i>Kluyveromyces lactis</i> 1054     | 1,290400 | 0,166093 | 0,095894 |
|     | <i>K. lactis</i> 617                 | 0,963457 | 0,234095 | 0,135155 |
|     | <i>K. marxianus</i> 620              | 1,098612 | 0,000000 | 0,000000 |
|     | <i>K. marxianus</i> 270              | 0,000000 | 0,000000 | 0,000000 |
|     | <i>K. marxianus</i> 258              | 0,000000 | 0,000000 | 0,000000 |
|     | <i>Geotrichum candidum</i> 878       | 0,231049 | 0,400189 | 0,231049 |
|     | <i>G. candidum</i> 870               | 1,730986 | 0,105263 | 0,060774 |
|     | <i>G. candidum</i> 832               | 1,290400 | 0,166093 | 0,095894 |
|     | <i>G. candidum</i> 1053              | 1,670212 | 0,105263 | 0,060774 |
|     | <i>G. candidum</i> 1061              | 0,000000 | 0,000000 | 0,000000 |
| 182 | <i>Candida krusei</i> 600            | 0,000000 | 0,000000 | 0,000000 |
|     | <i>C. inconspicua</i> 601            | 0,000000 | 0,000000 | 0,000000 |
|     | <i>C. parapsilosis</i> 612           | 0,963457 | 0,234095 | 0,135155 |
|     | <i>C. intermedia</i> 622             | 1,670212 | 0,105263 | 0,060774 |
|     | <i>C. apicola</i> 620                | 1,945910 | 0,000000 | 0,000000 |
|     | <i>C. zeylanoides</i> 623            | 0,828302 | 0,234095 | 0,135155 |
|     | <i>C. atlantica</i> 611              | 1,843143 | 0,088999 | 0,051384 |
|     | <i>Trichosporon asahii</i> 624       | 1,843143 | 0,088999 | 0,051384 |
|     | <i>T. domesticum</i> 1062            | 1,791759 | 0,000000 | 0,000000 |
|     | <i>T. coremiiforme</i> 607           | 1,670212 | 0,105263 | 0,060774 |
|     | <i>T. coremiiforme</i> 608           | 1,670212 | 0,105263 | 0,060774 |
|     | <i>Debaryomyces subglobosus</i> 2027 | 1,945910 | 0,000000 | 0,000000 |
|     | <i>D. hansenii</i> 742               | 0,462098 | 0,400189 | 0,231049 |
|     | <i>D. hansenii</i> 615               | 0,963457 | 0,234095 | 0,135155 |
|     | <i>D. hansenii</i> 47                | 1,945910 | 0,000000 | 0,000000 |
|     | <i>Kluyveromyces lactis</i> 1054     | 0,462098 | 0,400189 | 0,231049 |
|     | <i>K. lactis</i> 617                 | 0,828302 | 0,234095 | 0,135155 |
|     | <i>K. marxianus</i> 620              | 1,290400 | 0,166093 | 0,095894 |
|     | <i>K. marxianus</i> 270              | 0,000000 | 0,000000 | 0,000000 |
|     | <i>K. marxianus</i> 258              | 0,000000 | 0,000000 | 0,000000 |
|     | <i>Geotrichum candidum</i> 878       | 0,828302 | 0,234095 | 0,135155 |
|     | <i>G. candidum</i> 870               | 0,828302 | 0,234095 | 0,135155 |
|     | <i>G. candidum</i> 832               | 1,059351 | 0,348237 | 0,201055 |
|     | <i>G. candidum</i> 1053              | 0,963457 | 0,234095 | 0,135155 |
|     | <i>G. candidum</i> 1061              | 0,000000 | 0,000000 | 0,000000 |
| 185 | <i>Candida krusei</i> 600            | 0,000000 | 0,000000 | 0,000000 |
|     | <i>C. inconspicua</i> 601            | 0,231049 | 0,400189 | 0,231049 |
|     | <i>C. parapsilosis</i> 612           | 1,460676 | 0,128832 | 0,074381 |
|     | <i>C. intermedia</i> 622             | 1,535057 | 0,128832 | 0,074381 |
|     | <i>C. apicola</i> 620                | 1,843143 | 0,088999 | 0,051384 |
|     | <i>C. zeylanoides</i> 623            | 0,462098 | 0,400189 | 0,231049 |
|     | <i>C. atlantica</i> 611              | 1,843143 | 0,088999 | 0,051384 |
|     | <i>Trichosporon asahii</i> 624       | 1,843143 | 0,088999 | 0,051384 |

|     |                                      |          |          |          |
|-----|--------------------------------------|----------|----------|----------|
|     | <i>T. domesticum</i> 1062            | 1,791759 | 0,000000 | 0,000000 |
|     | <i>T. coremiiforme</i> 607           | 1,535057 | 0,128832 | 0,074381 |
|     | <i>T. coremiiforme</i> 608           | 1,364782 | 0,256091 | 0,147854 |
|     | <i>Debaryomyces subglobosus</i> 2027 | 1,945910 | 0,000000 | 0,000000 |
|     | <i>D. hansenii</i> 742               | 0,000000 | 0,000000 | 0,000000 |
|     | <i>D. hansenii</i> 615               | 0,693147 | 0,000000 | 0,000000 |
|     | <i>D. hansenii</i> 47                | 1,945910 | 0,000000 | 0,000000 |
|     | <i>Kluyveromyces lactis</i> 1054     | 0,963457 | 0,234095 | 0,135155 |
|     | <i>K. lactis</i> 617                 | 0,828302 | 0,234095 | 0,135155 |
|     | <i>K. marxianus</i> 620              | 1,194506 | 0,166093 | 0,095894 |
|     | <i>K. marxianus</i> 270              | 0,231049 | 0,400189 | 0,231049 |
|     | <i>K. marxianus</i> 258              | 0,462098 | 0,400189 | 0,231049 |
|     | <i>Geotrichum candidum</i> 878       | 0,597253 | 0,555548 | 0,320746 |
|     | <i>G. candidum</i> 870               | 0,597253 | 0,555548 | 0,320746 |
|     | <i>G. candidum</i> 832               | 0,693147 | 0,000000 | 0,000000 |
|     | <i>G. candidum</i> 1053              | 0,693147 | 0,000000 | 0,000000 |
|     | <i>G. candidum</i> 1061              | 0,000000 | 0,000000 | 0,000000 |
| 187 | <i>Candida krusei</i> 600            | 0,000000 | 0,000000 | 0,000000 |
|     | <i>C. inconspicua</i> 601            | 0,231049 | 0,400189 | 0,231049 |
|     | <i>C. parapsilosis</i> 612           | 1,194506 | 0,166093 | 0,095894 |
|     | <i>C. intermedia</i> 622             | 1,791759 | 0,000000 | 0,000000 |
|     | <i>C. apicola</i> 620                | 1,382357 | 0,924432 | 0,462216 |
|     | <i>C. zeylanoides</i> 623            | 1,098612 | 0,348237 | 0,201055 |
|     | <i>C. atlantica</i> 611              | 1,298239 | 0,869750 | 0,434875 |
|     | <i>Trichosporon asahii</i> 624       | 1,670212 | 0,105263 | 0,060774 |
|     | <i>T. domesticum</i> 1062            | 1,843143 | 0,088999 | 0,051384 |
|     | <i>T. coremiiforme</i> 607           | 1,439163 | 0,294925 | 0,170275 |
|     | <i>T. coremiiforme</i> 608           | 1,730986 | 0,105263 | 0,060774 |
|     | <i>Debaryomyces subglobosus</i> 2027 | 1,945910 | 0,000000 | 0,000000 |
|     | <i>D. hansenii</i> 742               | 0,000000 | 0,000000 | 0,000000 |
|     | <i>D. hansenii</i> 615               | 0,828302 | 0,234095 | 0,135155 |
|     | <i>D. hansenii</i> 47                | 1,945910 | 0,000000 | 0,000000 |
|     | <i>Kluyveromyces lactis</i> 1054     | 0,693147 | 0,000000 | 0,000000 |
|     | <i>K. lactis</i> 617                 | 1,098612 | 0,000000 | 0,000000 |
|     | <i>K. marxianus</i> 620              | 1,290400 | 0,166093 | 0,095894 |
|     | <i>K. marxianus</i> 270              | 0,000000 | 0,000000 | 0,000000 |
|     | <i>K. marxianus</i> 258              | 0,000000 | 0,000000 | 0,000000 |
|     | <i>Geotrichum candidum</i> 878       | 0,462098 | 0,400189 | 0,231049 |
|     | <i>G. candidum</i> 870               | 1,098612 | 0,000000 | 0,000000 |
|     | <i>G. candidum</i> 832               | 1,194506 | 0,166093 | 0,095894 |
|     | <i>G. candidum</i> 1053              | 0,963457 | 0,234095 | 0,135155 |
|     | <i>G. candidum</i> 1061              | 0,000000 | 0,000000 | 0,000000 |
| L12 | <i>Candida krusei</i> 600            | 0,231049 | 0,400189 | 0,231049 |
|     | <i>C. inconspicua</i> 601            | 0,462098 | 0,400189 | 0,231049 |

|     |                                      |          |          |          |
|-----|--------------------------------------|----------|----------|----------|
|     | <i>C. parapsilosis</i> 612           | 1,460676 | 0,128832 | 0,074381 |
|     | <i>C. intermedia</i> 622             | 1,670212 | 0,105263 | 0,060774 |
|     | <i>C. apicola</i> 620                | 1,386294 | 0,000000 | 0,000000 |
|     | <i>C. zeylanoides</i> 623            | 0,462098 | 0,400189 | 0,231049 |
|     | <i>C. atlantica</i> 611              | 1,894527 | 0,088999 | 0,051384 |
|     | <i>Trichosporon asahii</i> 624       | 1,791759 | 0,000000 | 0,000000 |
|     | <i>T. domesticum</i> 1062            | 1,843143 | 0,088999 | 0,051384 |
|     | <i>T. coremiiforme</i> 607           | 1,595831 | 0,203075 | 0,117245 |
|     | <i>T. coremiiforme</i> 608           | 1,730986 | 0,105263 | 0,060774 |
|     | <i>Debaryomyces subglobosus</i> 2027 | 1,843143 | 0,088999 | 0,051384 |
|     | <i>D. hansenii</i> 742               | 0,231049 | 0,400189 | 0,231049 |
|     | <i>D. hansenii</i> 615               | 0,597253 | 0,555548 | 0,320746 |
|     | <i>D. hansenii</i> 47                | 1,894527 | 0,088999 | 0,051384 |
|     | <i>Kluyveromyces lactis</i> 1054     | 1,535057 | 0,128832 | 0,074381 |
|     | <i>K. lactis</i> 617                 | 0,963457 | 0,234095 | 0,135155 |
|     | <i>K. marxianus</i> 620              | 0,000000 | 0,000000 | 0,000000 |
|     | <i>K. marxianus</i> 270              | 0,462098 | 0,400189 | 0,231049 |
|     | <i>K. marxianus</i> 258              | 0,000000 | 0,000000 | 0,000000 |
|     | <i>Geotrichum candidum</i> 878       | 0,828302 | 0,234095 | 0,135155 |
|     | <i>G. candidum</i> 870               | 1,730986 | 0,105263 | 0,060774 |
|     | <i>G. candidum</i> 832               | 1,229626 | 0,477814 | 0,275866 |
|     | <i>G. candidum</i> 1053              | 0,828302 | 0,234095 | 0,135155 |
|     | <i>G. candidum</i> 1061              | 0,000000 | 0,000000 | 0,000000 |
| L16 | <i>Candida krusei</i> 600            | 0,231049 | 0,400189 | 0,231049 |
|     | <i>C. inconspicua</i> 601            | 0,462098 | 0,400189 | 0,231049 |
|     | <i>C. parapsilosis</i> 612           | 1,730986 | 0,105263 | 0,060774 |
|     | <i>C. intermedia</i> 622             | 1,670212 | 0,105263 | 0,060774 |
|     | <i>C. apicola</i> 620                | 1,945910 | 0,000000 | 0,000000 |
|     | <i>C. zeylanoides</i> 623            | 0,693147 | 0,000000 | 0,000000 |
|     | <i>C. atlantica</i> 611              | 1,791759 | 0,000000 | 0,000000 |
|     | <i>Trichosporon asahii</i> 624       | 1,894527 | 0,088999 | 0,051384 |
|     | <i>T. domesticum</i> 1062            | 1,843143 | 0,088999 | 0,051384 |
|     | <i>T. coremiiforme</i> 607           | 1,670212 | 0,105263 | 0,060774 |
|     | <i>T. coremiiforme</i> 608           | 1,730986 | 0,105263 | 0,060774 |
|     | <i>Debaryomyces subglobosus</i> 2027 | 1,945910 | 0,000000 | 0,000000 |
|     | <i>D. hansenii</i> 742               | 0,462098 | 0,400189 | 0,231049 |
|     | <i>D. hansenii</i> 615               | 1,460676 | 0,128832 | 0,074381 |
|     | <i>D. hansenii</i> 47                | 1,945910 | 0,000000 | 0,000000 |
|     | <i>Kluyveromyces lactis</i> 1054     | 1,386294 | 0,000000 | 0,000000 |
|     | <i>K. lactis</i> 617                 | 0,963457 | 0,234095 | 0,135155 |
|     | <i>K. marxianus</i> 620              | 1,155245 | 0,400189 | 0,231049 |
|     | <i>K. marxianus</i> 270              | 0,000000 | 0,000000 | 0,000000 |
|     | <i>K. marxianus</i> 258              | 0,000000 | 0,000000 | 0,000000 |
|     | <i>Geotrichum candidum</i> 878       | 0,828302 | 0,234095 | 0,135155 |

|     |                                      |          |          |          |
|-----|--------------------------------------|----------|----------|----------|
|     | <i>G. candidum</i> 870               | 1,595831 | 0,203075 | 0,117245 |
|     | <i>G. candidum</i> 832               | 0,231049 | 0,400189 | 0,231049 |
|     | <i>G. candidum</i> 1053              | 1,364782 | 0,588753 | 0,339917 |
|     | <i>G. candidum</i> 1061              | 0,000000 | 0,000000 | 0,000000 |
| L17 | <i>Candida krusei</i> 600            | 0,000000 | 0,000000 | 0,000000 |
|     | <i>C. inconspicua</i> 601            | 0,462098 | 0,400189 | 0,231049 |
|     | <i>C. parapsilosis</i> 612           | 1,730986 | 0,105263 | 0,060774 |
|     | <i>C. intermedia</i> 622             | 1,670212 | 0,105263 | 0,060774 |
|     | <i>C. apicola</i> 620                | 1,843143 | 0,088999 | 0,051384 |
|     | <i>C. zeylanoides</i> 623            | 0,597253 | 0,555548 | 0,320746 |
|     | <i>C. atlantica</i> 611              | 1,730986 | 0,105263 | 0,060774 |
|     | <i>Trichosporon asahii</i> 624       | 1,945910 | 0,000000 | 0,000000 |
|     | <i>T. domesticum</i> 1062            | 1,730986 | 0,105263 | 0,060774 |
|     | <i>T. coremiiforme</i> 607           | 1,595831 | 0,203075 | 0,117245 |
|     | <i>T. coremiiforme</i> 608           | 1,730986 | 0,105263 | 0,060774 |
|     | <i>Debaryomyces subglobosus</i> 2027 | 1,945910 | 0,000000 | 0,000000 |
|     | <i>D. hansenii</i> 742               | 0,231049 | 0,400189 | 0,231049 |
|     | <i>D. hansenii</i> 615               | 0,462098 | 0,400189 | 0,231049 |
|     | <i>D. hansenii</i> 47                | 1,945910 | 0,000000 | 0,000000 |
|     | <i>Kluyveromyces lactis</i> 1054     | 1,535057 | 0,128832 | 0,074381 |
|     | <i>K. lactis</i> 617                 | 0,963457 | 0,234095 | 0,135155 |
|     | <i>K. marxianus</i> 620              | 1,290400 | 0,166093 | 0,095894 |
|     | <i>K. marxianus</i> 270              | 0,000000 | 0,000000 | 0,000000 |
|     | <i>K. marxianus</i> 258              | 0,000000 | 0,000000 | 0,000000 |
|     | <i>Geotrichum candidum</i> 878       | 0,000000 | 0,000000 | 0,000000 |
|     | <i>G. candidum</i> 870               | 1,730986 | 0,105263 | 0,060774 |
|     | <i>G. candidum</i> 832               | 0,000000 | 0,000000 | 0,000000 |
|     | <i>G. candidum</i> 1053              | 0,693147 | 0,000000 | 0,000000 |
|     | <i>G. candidum</i> 1061              | 0,000000 | 0,000000 | 0,000000 |
| L24 | <i>Candida krusei</i> 600            | 0,231049 | 0,400189 | 0,231049 |
|     | <i>C. inconspicua</i> 601            | 0,231049 | 0,400189 | 0,231049 |
|     | <i>C. parapsilosis</i> 612           | 1,670212 | 0,105263 | 0,060774 |
|     | <i>C. intermedia</i> 622             | 1,656604 | 0,234095 | 0,135155 |
|     | <i>C. apicola</i> 620                | 1,945910 | 0,000000 | 0,000000 |
|     | <i>C. zeylanoides</i> 623            | 0,828302 | 0,234095 | 0,135155 |
|     | <i>C. atlantica</i> 611              | 1,791759 | 0,000000 | 0,000000 |
|     | <i>Trichosporon asahii</i> 624       | 1,894527 | 0,088999 | 0,051384 |
|     | <i>T. domesticum</i> 1062            | 1,894527 | 0,088999 | 0,051384 |
|     | <i>T. coremiiforme</i> 607           | 1,460676 | 0,128832 | 0,074381 |
|     | <i>T. coremiiforme</i> 608           | 1,730986 | 0,105263 | 0,060774 |
|     | <i>Debaryomyces subglobosus</i> 2027 | 1,843143 | 0,088999 | 0,051384 |
|     | <i>D. hansenii</i> 742               | 0,462098 | 0,400189 | 0,231049 |
|     | <i>D. hansenii</i> 615               | 1,535057 | 0,128832 | 0,074381 |
|     | <i>D. hansenii</i> 47                | 1,894527 | 0,088999 | 0,051384 |

|     |                                      |          |          |          |
|-----|--------------------------------------|----------|----------|----------|
|     | <i>Kluyveromyces lactis</i> 1054     | 1,098612 | 0,000000 | 0,000000 |
|     | <i>K. lactis</i> 617                 | 0,963457 | 0,234095 | 0,135155 |
|     | <i>K. marxianus</i> 620              | 0,462098 | 0,400189 | 0,231049 |
|     | <i>K. marxianus</i> 270              | 0,000000 | 0,000000 | 0,000000 |
|     | <i>K. marxianus</i> 258              | 0,000000 | 0,000000 | 0,000000 |
|     | <i>Geotrichum candidum</i> 878       | 0,462098 | 0,400189 | 0,231049 |
|     | <i>G. candidum</i> 870               | 1,595831 | 0,203075 | 0,117245 |
|     | <i>G. candidum</i> 832               | 0,000000 | 0,000000 | 0,000000 |
|     | <i>G. candidum</i> 1053              | 0,462098 | 0,400189 | 0,231049 |
|     | <i>G. candidum</i> 1061              | 0,000000 | 0,000000 | 0,000000 |
| L32 | <i>Candida krusei</i> 600            | 0,000000 | 0,000000 | 0,000000 |
|     | <i>C. inconspicua</i> 601            | 0,231049 | 0,400189 | 0,231049 |
|     | <i>C. parapsilosis</i> 612           | 1,535057 | 0,128832 | 0,074381 |
|     | <i>C. intermedia</i> 622             | 1,730986 | 0,105263 | 0,060774 |
|     | <i>C. apicola</i> 620                | 0,462098 | 0,400189 | 0,231049 |
|     | <i>C. zeylanoides</i> 623            | 0,597253 | 0,555548 | 0,320746 |
|     | <i>C. atlantica</i> 611              | 1,843143 | 0,088999 | 0,051384 |
|     | <i>Trichosporon asahii</i> 624       | 1,894527 | 0,088999 | 0,051384 |
|     | <i>T. domesticum</i> 1062            | 1,843143 | 0,088999 | 0,051384 |
|     | <i>T. coremiiforme</i> 607           | 1,499937 | 0,359313 | 0,207450 |
|     | <i>T. coremiiforme</i> 608           | 1,730986 | 0,105263 | 0,060774 |
|     | <i>Debaryomyces subglobosus</i> 2027 | 1,945910 | 0,000000 | 0,000000 |
|     | <i>D. hansenii</i> 742               | 0,693147 | 0,000000 | 0,000000 |
|     | <i>D. hansenii</i> 615               | 1,098612 | 0,000000 | 0,000000 |
|     | <i>D. hansenii</i> 47                | 1,945910 | 0,000000 | 0,000000 |
|     | <i>Kluyveromyces lactis</i> 1054     | 0,000000 | 0,000000 | 0,000000 |
|     | <i>K. lactis</i> 617                 | 0,963457 | 0,234095 | 0,135155 |
|     | <i>K. marxianus</i> 620              | 0,000000 | 0,000000 | 0,000000 |
|     | <i>K. marxianus</i> 270              | 0,000000 | 0,000000 | 0,000000 |
|     | <i>K. marxianus</i> 258              | 0,000000 | 0,000000 | 0,000000 |
|     | <i>Geotrichum candidum</i> 878       | 0,000000 | 0,000000 | 0,000000 |
|     | <i>G. candidum</i> 870               | 1,730986 | 0,105263 | 0,060774 |
|     | <i>G. candidum</i> 832               | 1,595831 | 0,203075 | 0,117245 |
|     | <i>G. candidum</i> 1053              | 0,693147 | 0,000000 | 0,000000 |
|     | <i>G. candidum</i> 1061              | 0,000000 | 0,000000 | 0,000000 |
| 381 | <i>Candida krusei</i> 600            | 0,000000 | 0,000000 | 0,000000 |
|     | <i>C. inconspicua</i> 601            | 0,000000 | 0,000000 | 0,000000 |
|     | <i>C. parapsilosis</i> 612           | 0,963457 | 0,234095 | 0,135155 |
|     | <i>C. intermedia</i> 622             | 1,059351 | 0,348237 | 0,201055 |
|     | <i>C. apicola</i> 620                | 1,894527 | 0,088999 | 0,051384 |
|     | <i>C. zeylanoides</i> 623            | 0,366204 | 0,634284 | 0,366204 |
|     | <i>C. atlantica</i> 611              | 1,670212 | 0,105263 | 0,060774 |
|     | <i>Trichosporon asahii</i> 624       | 1,730986 | 0,105263 | 0,060774 |
|     | <i>T. domesticum</i> 1062            | 1,670212 | 0,105263 | 0,060774 |



|     |                                      |          |          |          |
|-----|--------------------------------------|----------|----------|----------|
|     | <i>T. coremiiforme</i> 607           | 1,535057 | 0,128832 | 0,074381 |
|     | <i>T. coremiiforme</i> 608           | 1,499937 | 0,359313 | 0,207450 |
|     | <i>Debaryomyces subglobosus</i> 2027 | 1,670212 | 0,105263 | 0,060774 |
|     | <i>D. hansenii</i> 742               | 0,828302 | 0,234095 | 0,135155 |
|     | <i>D. hansenii</i> 615               | 1,290400 | 0,166093 | 0,095894 |
|     | <i>D. hansenii</i> 47                | 1,730986 | 0,105263 | 0,060774 |
|     | <i>Kluyveromyces lactis</i> 1054     | 0,231049 | 0,400189 | 0,231049 |
|     | <i>K. lactis</i> 617                 | 0,732408 | 0,634284 | 0,366204 |
|     | <i>K. marxianus</i> 620              | 0,828302 | 0,234095 | 0,135155 |
|     | <i>K. marxianus</i> 270              | 0,000000 | 0,000000 | 0,000000 |
|     | <i>K. marxianus</i> 258              | 0,000000 | 0,000000 | 0,000000 |
|     | <i>Geotrichum candidum</i> 878       | 0,828302 | 0,234095 | 0,135155 |
|     | <i>G. candidum</i> 870               | 1,059351 | 0,348237 | 0,201055 |
|     | <i>G. candidum</i> 832               | 0,828302 | 0,234095 | 0,135155 |
|     | <i>G. candidum</i> 1053              | 0,963457 | 0,234095 | 0,135155 |
|     | <i>G. candidum</i> 1061              | 0,000000 | 0,000000 | 0,000000 |
| 383 | <i>Candida krusei</i> 600            | 0,000000 | 0,000000 | 0,000000 |
|     | <i>C. inconspicua</i> 601            | 0,231049 | 0,400189 | 0,231049 |
|     | <i>C. parapsilosis</i> 612           | 0,963457 | 0,234095 | 0,135155 |
|     | <i>C. intermedia</i> 622             | 1,133732 | 0,459154 | 0,265093 |
|     | <i>C. apicola</i> 620                | 1,782369 | 0,168433 | 0,097245 |
|     | <i>C. zeylanoides</i> 623            | 0,231049 | 0,400189 | 0,231049 |
|     | <i>C. atlantica</i> 611              | 0,963457 | 0,234095 | 0,135155 |
|     | <i>Trichosporon asahii</i> 624       | 1,843143 | 0,088999 | 0,051384 |
|     | <i>T. domesticum</i> 1062            | 1,609438 | 0,000000 | 0,000000 |
|     | <i>T. coremiiforme</i> 607           | 1,535057 | 0,128832 | 0,074381 |
|     | <i>T. coremiiforme</i> 608           | 1,843143 | 0,088999 | 0,051384 |
|     | <i>Debaryomyces subglobosus</i> 2027 | 1,843143 | 0,088999 | 0,051384 |
|     | <i>D. hansenii</i> 742               | 1,609438 | 0,000000 | 0,000000 |
|     | <i>D. hansenii</i> 615               | 1,535057 | 0,128832 | 0,074381 |
|     | <i>D. hansenii</i> 47                | 1,843143 | 0,088999 | 0,051384 |
|     | <i>Kluyveromyces lactis</i> 1054     | 0,693147 | 0,000000 | 0,000000 |
|     | <i>K. lactis</i> 617                 | 0,462098 | 0,400189 | 0,231049 |
|     | <i>K. marxianus</i> 620              | 0,828302 | 0,234095 | 0,135155 |
|     | <i>K. marxianus</i> 270              | 0,000000 | 0,000000 | 0,000000 |
|     | <i>K. marxianus</i> 258              | 0,000000 | 0,000000 | 0,000000 |
|     | <i>Geotrichum candidum</i> 878       | 0,231049 | 0,400189 | 0,231049 |
|     | <i>G. candidum</i> 870               | 0,963457 | 0,234095 | 0,135155 |
|     | <i>G. candidum</i> 832               | 0,462098 | 0,400189 | 0,231049 |
|     | <i>G. candidum</i> 1053              | 0,828302 | 0,234095 | 0,135155 |
|     | <i>G. candidum</i> 1061              | 0,000000 | 0,000000 | 0,000000 |
| 384 | <i>Candida krusei</i> 600            | 0,000000 | 0,000000 | 0,000000 |
|     | <i>C. inconspicua</i> 601            | 0,000000 | 0,000000 | 0,000000 |
|     | <i>C. parapsilosis</i> 612           | 0,963457 | 0,234095 | 0,135155 |

|     |                                      |          |          |          |
|-----|--------------------------------------|----------|----------|----------|
|     | <i>C. intermedia</i> 622             | 0,828302 | 0,234095 | 0,135155 |
|     | <i>C. apicola</i> 620                | 1,843143 | 0,088999 | 0,051384 |
|     | <i>C. zeylanoides</i> 623            | 0,000000 | 0,000000 | 0,000000 |
|     | <i>C. atlantica</i> 611              | 0,828302 | 0,234095 | 0,135155 |
|     | <i>Trichosporon asahii</i> 624       | 1,894527 | 0,088999 | 0,051384 |
|     | <i>T. domesticum</i> 1062            | 1,730986 | 0,105263 | 0,060774 |
|     | <i>T. coremiiforme</i> 607           | 1,460676 | 0,128832 | 0,074381 |
|     | <i>T. coremiiforme</i> 608           | 1,425555 | 0,348237 | 0,201055 |
|     | <i>Debaryomyces subglobosus</i> 2027 | 1,730986 | 0,105263 | 0,060774 |
|     | <i>D. hansenii</i> 742               | 0,462098 | 0,400189 | 0,231049 |
|     | <i>D. hansenii</i> 615               | 0,828302 | 0,234095 | 0,135155 |
|     | <i>D. hansenii</i> 47                | 1,791759 | 0,000000 | 0,000000 |
|     | <i>Kluyveromyces lactis</i> 1054     | 0,828302 | 0,234095 | 0,135155 |
|     | <i>K. lactis</i> 617                 | 0,732408 | 0,634284 | 0,366204 |
|     | <i>K. marxianus</i> 620              | 0,828302 | 0,234095 | 0,135155 |
|     | <i>K. marxianus</i> 270              | 0,231049 | 0,400189 | 0,231049 |
|     | <i>K. marxianus</i> 258              | 0,231049 | 0,400189 | 0,231049 |
|     | <i>Geotrichum candidum</i> 878       | 0,462098 | 0,400189 | 0,231049 |
|     | <i>G. candidum</i> 870               | 0,963457 | 0,234095 | 0,135155 |
|     | <i>G. candidum</i> 832               | 1,059351 | 0,348237 | 0,201055 |
|     | <i>G. candidum</i> 1053              | 0,462098 | 0,400189 | 0,231049 |
|     | <i>G. candidum</i> 1061              | 0,000000 | 0,000000 | 0,000000 |
| 391 | <i>Candida krusei</i> 600            | 0,231049 | 0,400189 | 0,231049 |
|     | <i>C. inconspicua</i> 601            | 0,462098 | 0,400189 | 0,231049 |
|     | <i>C. parapsilosis</i> 612           | 1,194506 | 0,166093 | 0,095894 |
|     | <i>C. intermedia</i> 622             | 1,670212 | 0,105263 | 0,060774 |
|     | <i>C. apicola</i> 620                | 1,945910 | 0,000000 | 0,000000 |
|     | <i>C. zeylanoides</i> 623            | 0,462098 | 0,400189 | 0,231049 |
|     | <i>C. atlantica</i> 611              | 1,670212 | 0,105263 | 0,060774 |
|     | <i>Trichosporon asahii</i> 624       | 1,843143 | 0,088999 | 0,051384 |
|     | <i>T. domesticum</i> 1062            | 1,730986 | 0,105263 | 0,060774 |
|     | <i>T. coremiiforme</i> 607           | 1,730986 | 0,105263 | 0,060774 |
|     | <i>T. coremiiforme</i> 608           | 1,670212 | 0,105263 | 0,060774 |
|     | <i>Debaryomyces subglobosus</i> 2027 | 1,730986 | 0,105263 | 0,060774 |
|     | <i>D. hansenii</i> 742               | 0,462098 | 0,400189 | 0,231049 |
|     | <i>D. hansenii</i> 615               | 1,535057 | 0,128832 | 0,074381 |
|     | <i>D. hansenii</i> 47                | 1,782369 | 0,168433 | 0,097245 |
|     | <i>Kluyveromyces lactis</i> 1054     | 1,059351 | 0,348237 | 0,201055 |
|     | <i>K. lactis</i> 617                 | 0,828302 | 0,234095 | 0,135155 |
|     | <i>K. marxianus</i> 620              | 0,828302 | 0,234095 | 0,135155 |
|     | <i>K. marxianus</i> 270              | 0,462098 | 0,400189 | 0,231049 |
|     | <i>K. marxianus</i> 258              | 0,231049 | 0,400189 | 0,231049 |
|     | <i>Geotrichum candidum</i> 878       | 0,231049 | 0,400189 | 0,231049 |
|     | <i>G. candidum</i> 870               | 0,828302 | 0,234095 | 0,135155 |

|       |                                      |          |          |          |
|-------|--------------------------------------|----------|----------|----------|
|       | <i>G. candidum</i> 832               | 1,059351 | 0,348237 | 0,201055 |
|       | <i>G. candidum</i> 1053              | 0,693147 | 0,000000 | 0,000000 |
|       | <i>G. candidum</i> 1061              | 0,000000 | 0,000000 | 0,000000 |
| 387   | <i>Candida krusei</i> 600            | 0,000000 | 0,000000 | 0,000000 |
|       | <i>C. inconspicua</i> 601            | 0,000000 | 0,000000 | 0,000000 |
|       | <i>C. parapsilosis</i> 612           | 0,828302 | 0,234095 | 0,135155 |
|       | <i>C. intermedia</i> 622             | 1,194506 | 0,166093 | 0,095894 |
|       | <i>C. apicola</i> 620                | 1,894527 | 0,088999 | 0,051384 |
|       | <i>C. zeylanoides</i> 623            | 0,000000 | 0,000000 | 0,000000 |
|       | <i>C. atlantica</i> 611              | 1,791759 | 0,000000 | 0,000000 |
|       | <i>Trichosporon asahii</i> 624       | 1,843143 | 0,088999 | 0,051384 |
|       | <i>T. domesticum</i> 1062            | 1,730986 | 0,105263 | 0,060774 |
|       | <i>T. coremiiforme</i> 607           | 1,535057 | 0,128832 | 0,074381 |
|       | <i>T. coremiiforme</i> 608           | 1,730986 | 0,105263 | 0,060774 |
|       | <i>Debaryomyces subglobosus</i> 2027 | 0,828302 | 0,234095 | 0,135155 |
|       | <i>D. hansenii</i> 742               | 1,843143 | 0,088999 | 0,051384 |
|       | <i>D. hansenii</i> 615               | 1,460676 | 0,128832 | 0,074381 |
|       | <i>D. hansenii</i> 47                | 1,730986 | 0,105263 | 0,060774 |
|       | <i>Kluyveromyces lactis</i> 1054     | 1,290400 | 0,166093 | 0,095894 |
|       | <i>K. lactis</i> 617                 | 0,693147 | 0,000000 | 0,000000 |
|       | <i>K. marxianus</i> 620              | 0,828302 | 0,234095 | 0,135155 |
|       | <i>K. marxianus</i> 270              | 0,231049 | 0,400189 | 0,231049 |
|       | <i>K. marxianus</i> 258              | 0,000000 | 0,000000 | 0,000000 |
|       | <i>Geotrichum candidum</i> 878       | 0,462098 | 0,400189 | 0,231049 |
|       | <i>G. candidum</i> 870               | 1,194506 | 0,166093 | 0,095894 |
|       | <i>G. candidum</i> 832               | 0,828302 | 0,234095 | 0,135155 |
|       | <i>G. candidum</i> 1053              | 0,828302 | 0,234095 | 0,135155 |
|       | <i>G. candidum</i> 1061              | 0,000000 | 0,000000 | 0,000000 |
| K19-1 | <i>Candida krusei</i> 600            | 0,462098 | 0,400189 | 0,231049 |
|       | <i>C. inconspicua</i> 601            | 0,693147 | 0,000000 | 0,000000 |
|       | <i>C. parapsilosis</i> 612           | 1,535057 | 0,128832 | 0,074381 |
|       | <i>C. intermedia</i> 622             | 1,730986 | 0,105263 | 0,060774 |
|       | <i>C. apicola</i> 620                | 1,894527 | 0,088999 | 0,051384 |
|       | <i>C. zeylanoides</i> 623            | 0,597253 | 0,555548 | 0,320746 |
|       | <i>C. atlantica</i> 611              | 1,782369 | 0,168433 | 0,097245 |
|       | <i>Trichosporon asahii</i> 624       | 1,945910 | 0,000000 | 0,000000 |
|       | <i>T. domesticum</i> 1062            | 1,843143 | 0,088999 | 0,051384 |
|       | <i>T. coremiiforme</i> 607           | 1,791759 | 0,000000 | 0,000000 |
|       | <i>T. coremiiforme</i> 608           | 1,843143 | 0,088999 | 0,051384 |
|       | <i>Debaryomyces subglobosus</i> 2027 | 1,945910 | 0,000000 | 0,000000 |
|       | <i>D. hansenii</i> 742               | 0,828302 | 0,234095 | 0,135155 |
|       | <i>D. hansenii</i> 615               | 1,194506 | 0,166093 | 0,095894 |
|       | <i>D. hansenii</i> 47                | 1,945910 | 0,000000 | 0,000000 |
|       | <i>Kluyveromyces lactis</i> 1054     | 0,828302 | 0,234095 | 0,135155 |

|       |                                      |          |          |          |
|-------|--------------------------------------|----------|----------|----------|
|       | <i>K. lactis</i> 617                 | 0,963457 | 0,234095 | 0,135155 |
|       | <i>K. marxianus</i> 620              | 1,290400 | 0,166093 | 0,095894 |
|       | <i>K. marxianus</i> 270              | 0,000000 | 0,000000 | 0,000000 |
|       | <i>K. marxianus</i> 258              | 0,231049 | 0,400189 | 0,231049 |
|       | <i>Geotrichum candidum</i> 878       | 1,290400 | 0,166093 | 0,095894 |
|       | <i>G. candidum</i> 870               | 1,059351 | 0,348237 | 0,201055 |
|       | <i>G. candidum</i> 832               | 1,595831 | 0,203075 | 0,117245 |
|       | <i>G. candidum</i> 1053              | 1,290400 | 0,166093 | 0,095894 |
|       | <i>G. candidum</i> 1061              | 0,462098 | 0,400189 | 0,231049 |
| K19-2 | <i>Candida krusei</i> 600            | 0,462098 | 0,400189 | 0,231049 |
|       | <i>C. inconspicua</i> 601            | 0,828302 | 0,234095 | 0,135155 |
|       | <i>C. parapsilosis</i> 612           | 1,670212 | 0,105263 | 0,060774 |
|       | <i>C. intermedia</i> 622             | 1,791759 | 0,000000 | 0,000000 |
|       | <i>C. apicola</i> 620                | 1,894527 | 0,088999 | 0,051384 |
|       | <i>C. zeylanoides</i> 623            | 0,597253 | 0,555548 | 0,320746 |
|       | <i>C. atlantica</i> 611              | 1,059351 | 0,348237 | 0,201055 |
|       | <i>Trichosporon asahii</i> 624       | 1,945910 | 0,000000 | 0,000000 |
|       | <i>T. domesticum</i> 1062            | 1,791759 | 0,000000 | 0,000000 |
|       | <i>T. coremiiforme</i> 607           | 1,730986 | 0,105263 | 0,060774 |
|       | <i>T. coremiiforme</i> 608           | 1,843143 | 0,088999 | 0,051384 |
|       | <i>Debaryomyces subglobosus</i> 2027 | 1,945910 | 0,000000 | 0,000000 |
|       | <i>D. hansenii</i> 742               | 0,828302 | 0,234095 | 0,135155 |
|       | <i>D. hansenii</i> 615               | 1,194506 | 0,166093 | 0,095894 |
|       | <i>D. hansenii</i> 47                | 1,894527 | 0,088999 | 0,051384 |
|       | <i>Kluyveromyces lactis</i> 1054     | 1,098612 | 0,000000 | 0,000000 |
|       | <i>K. lactis</i> 617                 | 0,963457 | 0,234095 | 0,135155 |
|       | <i>K. marxianus</i> 620              | 0,963457 | 0,234095 | 0,135155 |
|       | <i>K. marxianus</i> 270              | 0,462098 | 0,400189 | 0,231049 |
|       | <i>K. marxianus</i> 258              | 0,000000 | 0,000000 | 0,000000 |
|       | <i>Geotrichum candidum</i> 878       | 0,828302 | 0,234095 | 0,135155 |
|       | <i>G. candidum</i> 870               | 1,386294 | 0,000000 | 0,000000 |
|       | <i>G. candidum</i> 832               | 1,290400 | 0,166093 | 0,095894 |
|       | <i>G. candidum</i> 1053              | 0,828302 | 0,234095 | 0,135155 |
|       | <i>G. candidum</i> 1061              | 0,231049 | 0,400189 | 0,231049 |
| K19-3 | <i>Candida krusei</i> 600            | 0,963457 | 0,234095 | 0,135155 |
|       | <i>C. inconspicua</i> 601            | 1,155245 | 0,400189 | 0,231049 |
|       | <i>C. parapsilosis</i> 612           | 1,460676 | 0,128832 | 0,074381 |
|       | <i>C. intermedia</i> 622             | 1,535057 | 0,128832 | 0,074381 |
|       | <i>C. apicola</i> 620                | 1,843143 | 0,088999 | 0,051384 |
|       | <i>C. zeylanoides</i> 623            | 1,290400 | 0,166093 | 0,095894 |
|       | <i>C. atlantica</i> 611              | 1,894527 | 0,088999 | 0,051384 |
|       | <i>Trichosporon asahii</i> 624       | 1,945910 | 0,000000 | 0,000000 |
|       | <i>T. domesticum</i> 1062            | 1,843143 | 0,088999 | 0,051384 |
|       | <i>T. coremiiforme</i> 607           | 1,782369 | 0,168433 | 0,097245 |

|       |                                      |          |          |          |
|-------|--------------------------------------|----------|----------|----------|
|       | <i>T. coremiiforme</i> 608           | 1,843143 | 0,088999 | 0,051384 |
|       | <i>Debaryomyces subglobosus</i> 2027 | 1,894527 | 0,088999 | 0,051384 |
|       | <i>D. hansenii</i> 742               | 0,462098 | 0,400189 | 0,231049 |
|       | <i>D. hansenii</i> 615               | 1,460676 | 0,128832 | 0,074381 |
|       | <i>D. hansenii</i> 47                | 1,843143 | 0,088999 | 0,051384 |
|       | <i>Kluyveromyces lactis</i> 1054     | 1,059351 | 0,348237 | 0,201055 |
|       | <i>K. lactis</i> 617                 | 0,828302 | 0,234095 | 0,135155 |
|       | <i>K. marxianus</i> 620              | 0,828302 | 0,234095 | 0,135155 |
|       | <i>K. marxianus</i> 270              | 0,462098 | 0,400189 | 0,231049 |
|       | <i>K. marxianus</i> 258              | 0,000000 | 0,000000 | 0,000000 |
|       | <i>Geotrichum candidum</i> 878       | 1,059351 | 0,348237 | 0,201055 |
|       | <i>G. candidum</i> 870               | 0,963457 | 0,234095 | 0,135155 |
|       | <i>G. candidum</i> 832               | 1,155245 | 0,400189 | 0,231049 |
|       | <i>G. candidum</i> 1053              | 1,098612 | 0,000000 | 0,000000 |
|       | <i>G. candidum</i> 1061              | 0,231049 | 0,400189 | 0,231049 |
| K20-4 | <i>Candida krusei</i> 600            | 0,000000 | 0,000000 | 0,000000 |
|       | <i>C. inconspicua</i> 601            | 0,462098 | 0,400189 | 0,231049 |
|       | <i>C. parapsilosis</i> 612           | 1,290400 | 0,166093 | 0,095894 |
|       | <i>C. intermedia</i> 622             | 0,462098 | 0,400189 | 0,231049 |
|       | <i>C. apicola</i> 620                | 1,670212 | 0,105263 | 0,060774 |
|       | <i>C. zeylanoides</i> 623            | 0,693147 | 0,000000 | 0,000000 |
|       | <i>C. atlantica</i> 611              | 1,791759 | 0,000000 | 0,000000 |
|       | <i>Trichosporon asahii</i> 624       | 1,894527 | 0,088999 | 0,051384 |
|       | <i>T. domesticum</i> 1062            | 1,730986 | 0,105263 | 0,060774 |
|       | <i>T. coremiiforme</i> 607           | 1,791759 | 0,000000 | 0,000000 |
|       | <i>T. coremiiforme</i> 608           | 1,656604 | 0,234095 | 0,135155 |
|       | <i>Debaryomyces subglobosus</i> 2027 | 1,945910 | 0,000000 | 0,000000 |
|       | <i>D. hansenii</i> 742               | 0,462098 | 0,400189 | 0,231049 |
|       | <i>D. hansenii</i> 615               | 1,439163 | 0,294925 | 0,170275 |
|       | <i>D. hansenii</i> 47                | 1,843143 | 0,088999 | 0,051384 |
|       | <i>Kluyveromyces lactis</i> 1054     | 1,098612 | 0,000000 | 0,000000 |
|       | <i>K. lactis</i> 617                 | 0,963457 | 0,234095 | 0,135155 |
|       | <i>K. marxianus</i> 620              | 0,963457 | 0,234095 | 0,135155 |
|       | <i>K. marxianus</i> 270              | 0,231049 | 0,400189 | 0,231049 |
|       | <i>K. marxianus</i> 258              | 0,231049 | 0,400189 | 0,231049 |
|       | <i>Geotrichum candidum</i> 878       | 1,364782 | 0,256091 | 0,147854 |
|       | <i>G. candidum</i> 870               | 1,194506 | 0,166093 | 0,095894 |
|       | <i>G. candidum</i> 832               | 1,386294 | 0,000000 | 0,000000 |
|       | <i>G. candidum</i> 1053              | 0,828302 | 0,234095 | 0,135155 |
|       | <i>G. candidum</i> 1061              | 0,462098 | 0,400189 | 0,231049 |
| 3018  | <i>Candida krusei</i> 600            | 1,730986 | 0,105263 | 0,060774 |
|       | <i>C. inconspicua</i> 601            | 1,535057 | 0,128832 | 0,074381 |
|       | <i>C. parapsilosis</i> 612           | 1,843143 | 0,088999 | 0,051384 |
|       | <i>C. intermedia</i> 622             | 1,535057 | 0,128832 | 0,074381 |

|          |                                      |          |          |          |
|----------|--------------------------------------|----------|----------|----------|
|          | <i>C. apicola</i> 620                | 1,843143 | 0,088999 | 0,051384 |
|          | <i>C. zeylanoides</i> 623            | 1,194506 | 0,166093 | 0,095894 |
|          | <i>C. atlantica</i> 611              | 1,945910 | 0,000000 | 0,000000 |
|          | <i>Trichosporon asahii</i> 624       | 1,894527 | 0,088999 | 0,051384 |
|          | <i>T. domesticum</i> 1062            | 1,791759 | 0,000000 | 0,000000 |
|          | <i>T. coremiiforme</i> 607           | 1,670212 | 0,105263 | 0,060774 |
|          | <i>T. coremiiforme</i> 608           | 1,670212 | 0,105263 | 0,060774 |
|          | <i>Debaryomyces subglobosus</i> 2027 | 1,945910 | 0,000000 | 0,000000 |
|          | <i>D. hansenii</i> 742               | 0,462098 | 0,400189 | 0,231049 |
|          | <i>D. hansenii</i> 615               | 1,386294 | 0,000000 | 0,000000 |
|          | <i>D. hansenii</i> 47                | 1,843143 | 0,088999 | 0,051384 |
|          | <i>Kluyveromyces lactis</i> 1054     | 0,963457 | 0,234095 | 0,135155 |
|          | <i>K. lactis</i> 617                 | 1,098612 | 0,000000 | 0,000000 |
|          | <i>K. marxianus</i> 620              | 1,059351 | 0,348237 | 0,201055 |
|          | <i>K. marxianus</i> 270              | 0,462098 | 0,400189 | 0,231049 |
|          | <i>K. marxianus</i> 258              | 0,231049 | 0,400189 | 0,231049 |
|          | <i>Geotrichum candidum</i> 878       | 1,386294 | 0,000000 | 0,000000 |
|          | <i>G. candidum</i> 870               | 0,963457 | 0,234095 | 0,135155 |
|          | <i>G. candidum</i> 832               | 0,963457 | 0,234095 | 0,135155 |
|          | <i>G. candidum</i> 1053              | 1,098612 | 0,000000 | 0,000000 |
|          | <i>G. candidum</i> 1061              | 0,462098 | 0,400189 | 0,231049 |
| controls | <i>Candida krusei</i> 600            | 0,000000 | 0,000000 | 0,000000 |
|          | <i>C. inconspicua</i> 601            | 0,000000 | 0,000000 | 0,000000 |
|          | <i>C. parapsilosis</i> 612           | 0,000000 | 0,000000 | 0,000000 |
|          | <i>C. intermedia</i> 622             | 0,000000 | 0,000000 | 0,000000 |
|          | <i>C. apicola</i> 620                | 0,000000 | 0,000000 | 0,000000 |
|          | <i>C. zeylanoides</i> 623            | 0,000000 | 0,000000 | 0,000000 |
|          | <i>C. atlantica</i> 611              | 0,000000 | 0,000000 | 0,000000 |
|          | <i>Trichosporon asahii</i> 624       | 0,000000 | 0,000000 | 0,000000 |
|          | <i>T. domesticum</i> 1062            | 0,000000 | 0,000000 | 0,000000 |
|          | <i>T. coremiiforme</i> 607           | 0,000000 | 0,000000 | 0,000000 |
|          | <i>T. coremiiforme</i> 608           | 0,000000 | 0,000000 | 0,000000 |
|          | <i>Debaryomyces subglobosus</i> 2027 | 0,000000 | 0,000000 | 0,000000 |
|          | <i>D. hansenii</i> 742               | 0,000000 | 0,000000 | 0,000000 |
|          | <i>D. hansenii</i> 615               | 0,000000 | 0,000000 | 0,000000 |
|          | <i>D. hansenii</i> 47                | 0,000000 | 0,000000 | 0,000000 |
|          | <i>Kluyveromyces lactis</i> 1054     | 0,000000 | 0,000000 | 0,000000 |
|          | <i>K. lactis</i> 617                 | 0,000000 | 0,000000 | 0,000000 |
|          | <i>K. marxianus</i> 620              | 0,000000 | 0,000000 | 0,000000 |
|          | <i>K. marxianus</i> 270              | 0,000000 | 0,000000 | 0,000000 |
|          | <i>K. marxianus</i> 258              | 0,000000 | 0,000000 | 0,000000 |
|          | <i>Geotrichum candidum</i> 878       | 0,000000 | 0,000000 | 0,000000 |
|          | <i>G. candidum</i> 870               | 0,000000 | 0,000000 | 0,000000 |
|          | <i>G. candidum</i> 832               | 18,96667 | 2,14554  | 1,23873  |

|  |                         |          |         |         |
|--|-------------------------|----------|---------|---------|
|  | <i>G. candidum</i> 1053 | 15,56667 | 0,32146 | 0,18559 |
|  | <i>G. candidum</i> 1061 | 15,56667 | 0,55076 | 0,31798 |

**Table S4** The variability of yeast colony average (mm) characterised by mean, standard deviation (s.d.) and standard error of means (s.e.m.). The data resulted from Factorial ANOVA, Statistica 12v., Significant at  $\alpha \leq 0.05$ .

| <i>L. plantarum</i> strains | yeast                                | mean     | s.d.    | s.e.m.  |
|-----------------------------|--------------------------------------|----------|---------|---------|
| 191                         | <i>Candida krusei</i> 600            | 24,08333 | 1,18145 | 0,68211 |
|                             | <i>C. inconspicua</i> 601            | 11,50000 | 1,00000 | 0,57735 |
|                             | <i>C. parapsilosis</i> 612           | 15,43333 | 0,81445 | 0,47022 |
|                             | <i>C. intermedia</i> 622             | 14,00000 | 1,11355 | 0,64291 |
|                             | <i>C. apicola</i> 620                | 0,00000  | 0,00000 | 0,00000 |
|                             | <i>C. zeylanoides</i> 623            | 9,41667  | 0,62915 | 0,36324 |
|                             | <i>C. atlantica</i> 611              | 0,00000  | 0,00000 | 0,00000 |
|                             | <i>Trichosporon asahii</i> 624       | 0,00000  | 0,00000 | 0,00000 |
|                             | <i>T. domesticum</i> 1062            | 11,36667 | 0,77675 | 0,44845 |
|                             | <i>T. coremiiforme</i> 607           | 14,16667 | 0,90738 | 0,52387 |
|                             | <i>T. coremiiforme</i> 608           | 6,86667  | 1,70098 | 0,98206 |
|                             | <i>Debaryomyces subglobosus</i> 2027 | 0,00000  | 0,00000 | 0,00000 |
|                             | <i>D. hansenii</i> 742               | 0,00000  | 0,00000 | 0,00000 |
|                             | <i>D. hansenii</i> 615               | 0,00000  | 0,00000 | 0,00000 |
|                             | <i>D. hansenii</i> 47                | 0,00000  | 0,00000 | 0,00000 |
|                             | <i>Kluyveromyces lactis</i> 1054     | 11,20000 | 0,96437 | 0,55678 |
|                             | <i>K. lactis</i> 617                 | 6,26667  | 5,50121 | 3,17613 |
|                             | <i>K. marxianus</i> 620              | 9,03333  | 1,98578 | 1,14649 |
|                             | <i>K. marxianus</i> 270              | 11,20000 | 0,95394 | 0,55076 |
|                             | <i>K. marxianus</i> 258              | 10,40000 | 1,95192 | 1,12694 |
|                             | <i>Geotrichum candidum</i> 878       | 4,50000  | 0,70000 | 0,40415 |
|                             | <i>G. candidum</i> 870               | 0,83333  | 1,44338 | 0,83333 |
|                             | <i>G. candidum</i> 832               | 8,83333  | 2,63122 | 1,51914 |
|                             | <i>G. candidum</i> 1053              | 8,63333  | 3,56978 | 2,06101 |
|                             | <i>G. candidum</i> 1061              | 11,33333 | 1,62891 | 0,94045 |
| 196                         | <i>Candida krusei</i> 600            | 25,28333 | 1,10265 | 0,63661 |
|                             | <i>C. inconspicua</i> 601            | 10,73333 | 1,36504 | 0,78811 |
|                             | <i>C. parapsilosis</i> 612           | 10,68333 | 1,53324 | 0,88522 |
|                             | <i>C. intermedia</i> 622             | 9,58333  | 1,25831 | 0,72648 |
|                             | <i>C. apicola</i> 620                | 0,00000  | 0,00000 | 0,00000 |
|                             | <i>C. zeylanoides</i> 623            | 8,63333  | 0,51316 | 0,29627 |
|                             | <i>C. atlantica</i> 611              | 0,00000  | 0,00000 | 0,00000 |
|                             | <i>Trichosporon asahii</i> 624       | 0,00000  | 0,00000 | 0,00000 |
|                             | <i>T. domesticum</i> 1062            | 8,41667  | 1,70612 | 0,98503 |

|     |                                      |          |         |         |
|-----|--------------------------------------|----------|---------|---------|
|     | <i>T. coremiiforme</i> 607           | 14,20000 | 1,40000 | 0,80829 |
|     | <i>T. coremiiforme</i> 608           | 10,23333 | 2,05020 | 1,18369 |
|     | <i>Debaryomyces subglobosus</i> 2027 | 0,00000  | 0,00000 | 0,00000 |
|     | <i>D. hansenii</i> 742               | 11,50000 | 0,91652 | 0,52915 |
|     | <i>D. hansenii</i> 615               | 3,33333  | 2,89367 | 1,67066 |
|     | <i>D. hansenii</i> 47                | 7,33333  | 0,85049 | 0,49103 |
|     | <i>Kluyveromyces lactis</i> 1054     | 9,85000  | 1,39374 | 0,80467 |
|     | <i>K. lactis</i> 617                 | 13,66667 | 1,36137 | 0,78599 |
|     | <i>K. marxianus</i> 620              | 12,66667 | 1,45717 | 0,84130 |
|     | <i>K. marxianus</i> 270              | 16,43333 | 0,70946 | 0,40961 |
|     | <i>K. marxianus</i> 258              | 17,40000 | 0,85440 | 0,49329 |
|     | <i>Geotrichum candidum</i> 878       | 4,93333  | 8,54478 | 4,93333 |
|     | <i>G. candidum</i> 870               | 3,33333  | 2,99555 | 1,72948 |
|     | <i>G. candidum</i> 832               | 6,43333  | 0,49329 | 0,28480 |
|     | <i>G. candidum</i> 1053              | 0,00000  | 0,00000 | 0,00000 |
|     | <i>G. candidum</i> 1061              | 8,56667  | 2,15484 | 1,24410 |
| 182 | <i>Candida krusei</i> 600            | 13,15000 | 0,91788 | 0,52994 |
|     | <i>C. inconspicua</i> 601            | 12,25000 | 0,43301 | 0,25000 |
|     | <i>C. parapsilosis</i> 612           | 8,83333  | 0,80364 | 0,46398 |
|     | <i>C. intermedia</i> 622             | 11,31667 | 0,98784 | 0,57033 |
|     | <i>C. apicola</i> 620                | 0,00000  | 0,00000 | 0,00000 |
|     | <i>C. zeylanoides</i> 623            | 7,75000  | 1,27574 | 0,73655 |
|     | <i>C. atlantica</i> 611              | 0,00000  | 0,00000 | 0,00000 |
|     | <i>Trichosporon asahii</i> 624       | 0,00000  | 0,00000 | 0,00000 |
|     | <i>T. domesticum</i> 1062            | 5,33333  | 0,50332 | 0,29059 |
|     | <i>T. coremiiforme</i> 607           | 7,20000  | 1,24900 | 0,72111 |
|     | <i>T. coremiiforme</i> 608           | 6,23333  | 0,55076 | 0,31798 |
|     | <i>Debaryomyces subglobosus</i> 2027 | 0,00000  | 0,00000 | 0,00000 |
|     | <i>D. hansenii</i> 742               | 9,10000  | 0,95394 | 0,55076 |
|     | <i>D. hansenii</i> 615               | 0,00000  | 0,00000 | 0,00000 |
|     | <i>D. hansenii</i> 47                | 0,00000  | 0,00000 | 0,00000 |
|     | <i>Kluyveromyces lactis</i> 1054     | 5,90000  | 0,81854 | 0,47258 |
|     | <i>K. lactis</i> 617                 | 5,60000  | 1,05830 | 0,61101 |
|     | <i>K. marxianus</i> 620              | 10,00000 | 1,37477 | 0,79373 |
|     | <i>K. marxianus</i> 270              | 8,36667  | 3,05669 | 1,76478 |
|     | <i>K. marxianus</i> 258              | 8,56667  | 0,85049 | 0,49103 |
|     | <i>Geotrichum candidum</i> 878       | 0,00000  | 0,00000 | 0,00000 |
|     | <i>G. candidum</i> 870               | 7,13333  | 1,23423 | 0,71259 |
|     | <i>G. candidum</i> 832               | 5,50000  | 4,76340 | 2,75015 |
|     | <i>G. candidum</i> 1053              | 1,86667  | 3,23316 | 1,86667 |
|     | <i>G. candidum</i> 1061              | 8,53333  | 0,70946 | 0,40961 |
| 185 | <i>Candida krusei</i> 600            | 6,91667  | 0,38188 | 0,22048 |
|     | <i>C. inconspicua</i> 601            | 9,48333  | 0,44814 | 0,25874 |
|     | <i>C. parapsilosis</i> 612           | 8,33333  | 0,47258 | 0,27285 |



|     |                                      |          |          |          |
|-----|--------------------------------------|----------|----------|----------|
|     | <i>C. intermedia</i> 622             | 10,06667 | 0,51316  | 0,29627  |
|     | <i>C. apicola</i> 620                | 0,00000  | 0,00000  | 0,00000  |
|     | <i>C. zeylanoides</i> 623            | 6,16667  | 0,85049  | 0,49103  |
|     | <i>C. atlantica</i> 611              | 0,00000  | 0,00000  | 0,00000  |
|     | <i>Trichosporon asahii</i> 624       | 0,00000  | 0,00000  | 0,00000  |
|     | <i>T. domesticum</i> 1062            | 8,20000  | 1,17898  | 0,68069  |
|     | <i>T. coremiiforme</i> 607           | 8,66667  | 0,56862  | 0,32830  |
|     | <i>T. coremiiforme</i> 608           | 9,20000  | 1,40000  | 0,80829  |
|     | <i>Debaryomyces subglobosus</i> 2027 | 0,00000  | 0,00000  | 0,00000  |
|     | <i>D. hansenii</i> 742               | 12,10000 | 1,21244  | 0,70000  |
|     | <i>D. hansenii</i> 615               | 1,73333  | 3,00222  | 1,73333  |
|     | <i>D. hansenii</i> 47                | 0,00000  | 0,00000  | 0,00000  |
|     | <i>Kluyveromyces lactis</i> 1054     | 8,63333  | 1,40119  | 0,80898  |
|     | <i>K. lactis</i> 617                 | 30,26667 | 36,15098 | 20,87178 |
|     | <i>K. marxianus</i> 620              | 11,33333 | 0,15275  | 0,08819  |
|     | <i>K. marxianus</i> 270              | 7,90000  | 0,30000  | 0,17321  |
|     | <i>K. marxianus</i> 258              | 9,16667  | 1,02632  | 0,59255  |
|     | <i>Geotrichum candidum</i> 878       | 0,00000  | 0,00000  | 0,00000  |
|     | <i>G. candidum</i> 870               | 7,06667  | 0,90738  | 0,52387  |
|     | <i>G. candidum</i> 832               | 6,90000  | 1,57162  | 0,90738  |
|     | <i>G. candidum</i> 1053              | 0,00000  | 0,00000  | 0,00000  |
|     | <i>G. candidum</i> 1061              | 10,56667 | 1,86100  | 1,07445  |
| 187 | <i>Candida krusei</i> 600            | 0,00000  | 0,00000  | 0,00000  |
|     | <i>C. inconspicua</i> 601            | 8,21667  | 0,36856  | 8,21667  |
|     | <i>C. parapsilosis</i> 612           | 0,00000  | 0,00000  | 0,00000  |
|     | <i>C. intermedia</i> 622             | 10,26667 | 0,47522  | 10,26667 |
|     | <i>C. apicola</i> 620                | 2,06250  | 4,12500  | 2,06250  |
|     | <i>C. zeylanoides</i> 623            | 9,20000  | 1,02632  | 9,20000  |
|     | <i>C. atlantica</i> 611              | 2,18750  | 4,37500  | 2,18750  |
|     | <i>Trichosporon asahii</i> 624       | 0,00000  | 0,00000  | 0,00000  |
|     | <i>T. domesticum</i> 1062            | 8,80000  | 1,30767  | 8,80000  |
|     | <i>T. coremiiforme</i> 607           | 8,40000  | 1,90000  | 8,40000  |
|     | <i>T. coremiiforme</i> 608           | 8,66667  | 0,47258  | 8,66667  |
|     | <i>Debaryomyces subglobosus</i> 2027 | 0,00000  | 0,00000  | 0,00000  |
|     | <i>D. hansenii</i> 742               | 12,10000 | 1,21244  | 12,10000 |
|     | <i>D. hansenii</i> 615               | 0,00000  | 0,00000  | 0,00000  |
|     | <i>D. hansenii</i> 47                | 6,10000  | 0,81854  | 6,10000  |
|     | <i>Kluyveromyces lactis</i> 1054     | 9,36667  | 0,76376  | 9,36667  |
|     | <i>K. lactis</i> 617                 | 10,80000 | 1,30000  | 10,80000 |
|     | <i>K. marxianus</i> 620              | 10,63333 | 3,88115  | 10,63333 |
|     | <i>K. marxianus</i> 270              | 7,73333  | 1,28582  | 7,73333  |
|     | <i>K. marxianus</i> 258              | 7,63333  | 1,06927  | 7,63333  |
|     | <i>Geotrichum candidum</i> 878       | 0,00000  | 0,00000  | 0,00000  |
|     | <i>G. candidum</i> 870               | 8,66667  | 0,47258  | 8,66667  |

|     |                                      |          |         |         |
|-----|--------------------------------------|----------|---------|---------|
|     | <i>G. candidum</i> 832               | 8,50000  | 1,21244 | 8,50000 |
|     | <i>G. candidum</i> 1053              | 0,00000  | 0,00000 | 0,00000 |
|     | <i>G. candidum</i> 1061              | 8,46667  | 0,90738 | 8,46667 |
| L12 | <i>Candida krusei</i> 600            | 0,00000  | 0,00000 | 0,00000 |
|     | <i>C. inconspicua</i> 601            | 0,00000  | 0,00000 | 0,00000 |
|     | <i>C. parapsilosis</i> 612           | 0,00000  | 0,00000 | 0,00000 |
|     | <i>C. intermedia</i> 622             | 0,00000  | 0,00000 | 0,00000 |
|     | <i>C. apicola</i> 620                | 0,00000  | 0,00000 | 0,00000 |
|     | <i>C. zeylanoides</i> 623            | 0,00000  | 0,00000 | 0,00000 |
|     | <i>C. atlantica</i> 611              | 0,00000  | 0,00000 | 0,00000 |
|     | <i>Trichosporon asahii</i> 624       | 2,06667  | 3,57957 | 2,06667 |
|     | <i>T. domesticum</i> 1062            | 5,50000  | 0,26458 | 0,15275 |
|     | <i>T. coremiiforme</i> 607           | 6,10000  | 0,81854 | 0,47258 |
|     | <i>T. coremiiforme</i> 608           | 5,83333  | 0,90738 | 0,52387 |
|     | <i>Debaryomyces subglobosus</i> 2027 | 0,00000  | 0,00000 | 0,00000 |
|     | <i>D. hansenii</i> 742               | 4,70000  | 4,07308 | 2,35160 |
|     | <i>D. hansenii</i> 615               | 1,73333  | 3,00222 | 1,73333 |
|     | <i>D. hansenii</i> 47                | 5,56667  | 0,75056 | 0,43333 |
|     | <i>Kluyveromyces lactis</i> 1054     | 0,00000  | 0,00000 | 0,00000 |
|     | <i>K. lactis</i> 617                 | 5,56667  | 0,60277 | 0,34801 |
|     | <i>K. marxianus</i> 620              | 6,00000  | 0,70000 | 0,40415 |
|     | <i>K. marxianus</i> 270              | 5,20000  | 0,40000 | 0,23094 |
|     | <i>K. marxianus</i> 258              | 6,26667  | 0,55076 | 0,31798 |
|     | <i>Geotrichum candidum</i> 878       | 0,00000  | 0,00000 | 0,00000 |
|     | <i>G. candidum</i> 870               | 11,20000 | 0,95394 | 0,55076 |
|     | <i>G. candidum</i> 832               | 10,36667 | 0,86217 | 0,49777 |
|     | <i>G. candidum</i> 1053              | 6,63333  | 0,70238 | 0,40552 |
|     | <i>G. candidum</i> 1061              | 7,56667  | 0,65064 | 0,37565 |
| L16 | <i>Candida krusei</i> 600            | 13,01667 | 0,41932 | 0,24210 |
|     | <i>C. inconspicua</i> 601            | 11,18333 | 0,35473 | 0,20480 |
|     | <i>C. parapsilosis</i> 612           | 12,01667 | 0,22546 | 0,13017 |
|     | <i>C. intermedia</i> 622             | 12,73333 | 0,50332 | 0,29059 |
|     | <i>C. apicola</i> 620                | 0,00000  | 0,00000 | 0,00000 |
|     | <i>C. zeylanoides</i> 623            | 7,83333  | 0,32146 | 0,18559 |
|     | <i>C. atlantica</i> 611              | 0,00000  | 0,00000 | 0,00000 |
|     | <i>Trichosporon asahii</i> 624       | 0,00000  | 0,00000 | 0,00000 |
|     | <i>T. domesticum</i> 1062            | 9,16667  | 0,61101 | 0,35277 |
|     | <i>T. coremiiforme</i> 607           | 7,36667  | 0,51316 | 0,29627 |
|     | <i>T. coremiiforme</i> 608           | 6,46667  | 0,30551 | 0,17638 |
|     | <i>Debaryomyces subglobosus</i> 2027 | 0,00000  | 0,00000 | 0,00000 |
|     | <i>D. hansenii</i> 742               | 5,76667  | 0,45092 | 0,26034 |
|     | <i>D. hansenii</i> 615               | 0,00000  | 0,00000 | 0,00000 |
|     | <i>D. hansenii</i> 47                | 5,76667  | 0,55076 | 0,31798 |
|     | <i>Kluyveromyces lactis</i> 1054     | 7,06667  | 1,40475 | 0,81104 |

|     |                                      |          |         |         |
|-----|--------------------------------------|----------|---------|---------|
|     | <i>K. lactis</i> 617                 | 6,20000  | 0,36056 | 0,20817 |
|     | <i>K. marxianus</i> 620              | 10,10000 | 1,41774 | 0,81854 |
|     | <i>K. marxianus</i> 270              | 10,66667 | 0,56862 | 0,32830 |
|     | <i>K. marxianus</i> 258              | 8,66667  | 0,20817 | 0,12019 |
|     | <i>Geotrichum candidum</i> 878       | 8,16667  | 0,58595 | 0,33830 |
|     | <i>G. candidum</i> 870               | 0,00000  | 0,00000 | 0,00000 |
|     | <i>G. candidum</i> 832               | 6,93333  | 1,30512 | 0,75351 |
|     | <i>G. candidum</i> 1053              | 11,36667 | 0,86217 | 0,49777 |
|     | <i>G. candidum</i> 1061              | 11,90000 | 0,95394 | 0,55076 |
| L17 | <i>Candida krusei</i> 600            | 11,60000 | 0,85440 | 0,49329 |
|     | <i>C. inconspicua</i> 601            | 10,85000 | 0,37749 | 0,21794 |
|     | <i>C. parapsilosis</i> 612           | 8,01667  | 0,36171 | 0,20883 |
|     | <i>C. intermedia</i> 622             | 7,73333  | 0,50332 | 0,29059 |
|     | <i>C. apicola</i> 620                | 0,00000  | 0,00000 | 0,00000 |
|     | <i>C. zeylanoides</i> 623            | 8,13333  | 0,40415 | 0,23333 |
|     | <i>C. atlantica</i> 611              | 0,00000  | 0,00000 | 0,00000 |
|     | <i>Trichosporon asahii</i> 624       | 5,91667  | 0,29297 | 0,16915 |
|     | <i>T. domesticum</i> 1062            | 8,00000  | 0,43589 | 0,25166 |
|     | <i>T. coremiiforme</i> 607           | 6,73333  | 0,45092 | 0,26034 |
|     | <i>T. coremiiforme</i> 608           | 6,23333  | 0,45092 | 0,26034 |
|     | <i>Debaryomyces subglobosus</i> 2027 | 0,00000  | 0,00000 | 0,00000 |
|     | <i>D. hansenii</i> 742               | 7,46667  | 0,83267 | 0,48074 |
|     | <i>D. hansenii</i> 615               | 5,96667  | 0,20817 | 0,12019 |
|     | <i>D. hansenii</i> 47                | 7,43333  | 0,70946 | 0,40961 |
|     | <i>Kluyveromyces lactis</i> 1054     | 7,53333  | 0,58595 | 0,33830 |
|     | <i>K. lactis</i> 617                 | 6,38333  | 0,43684 | 0,25221 |
|     | <i>K. marxianus</i> 620              | 7,46667  | 0,37528 | 0,21667 |
|     | <i>K. marxianus</i> 270              | 8,80000  | 0,36056 | 0,20817 |
|     | <i>K. marxianus</i> 258              | 8,53333  | 0,83267 | 0,48074 |
|     | <i>Geotrichum candidum</i> 878       | 15,13333 | 0,40415 | 0,23333 |
|     | <i>G. candidum</i> 870               | 15,08333 | 0,24664 | 0,14240 |
|     | <i>G. candidum</i> 832               | 12,73333 | 0,58595 | 0,33830 |
|     | <i>G. candidum</i> 1053              | 13,76667 | 1,10604 | 0,63857 |
|     | <i>G. candidum</i> 1061              | 15,13333 | 0,37859 | 0,21858 |
| L24 | <i>Candida krusei</i> 600            | 13,98333 | 0,41932 | 0,24210 |
|     | <i>C. inconspicua</i> 601            | 11,76667 | 0,66583 | 0,38442 |
|     | <i>C. parapsilosis</i> 612           | 9,00000  | 0,98489 | 0,56862 |
|     | <i>C. intermedia</i> 622             | 10,13333 | 0,40415 | 0,23333 |
|     | <i>C. apicola</i> 620                | 0,00000  | 0,00000 | 0,00000 |
|     | <i>C. zeylanoides</i> 623            | 8,53333  | 0,70238 | 0,40552 |
|     | <i>C. atlantica</i> 611              | 0,00000  | 0,00000 | 0,00000 |
|     | <i>Trichosporon asahii</i> 624       | 0,00000  | 0,00000 | 0,00000 |
|     | <i>T. domesticum</i> 1062            | 3,33333  | 2,89367 | 1,67066 |
|     | <i>T. coremiiforme</i> 607           | 0,00000  | 0,00000 | 0,00000 |

|     |                                      |          |         |         |
|-----|--------------------------------------|----------|---------|---------|
|     | <i>T. coremiiforme</i> 608           | 0,00000  | 0,00000 | 0,00000 |
|     | <i>Debaryomyces subglobosus</i> 2027 | 0,00000  | 0,00000 | 0,00000 |
|     | <i>D. hansenii</i> 742               | 5,43333  | 0,77675 | 0,44845 |
|     | <i>D. hansenii</i> 615               | 0,00000  | 0,00000 | 0,00000 |
|     | <i>D. hansenii</i> 47                | 7,96667  | 0,49329 | 0,28480 |
|     | <i>Kluyveromyces lactis</i> 1054     | 6,43333  | 1,09697 | 0,63333 |
|     | <i>K. lactis</i> 617                 | 0,00000  | 0,00000 | 0,00000 |
|     | <i>K. marxianus</i> 620              | 0,00000  | 0,00000 | 0,00000 |
|     | <i>K. marxianus</i> 270              | 5,53333  | 0,70238 | 0,40552 |
|     | <i>K. marxianus</i> 258              | 7,43333  | 0,61101 | 0,35277 |
|     | <i>Geotrichum candidum</i> 878       | 5,10000  | 0,26458 | 0,15275 |
|     | <i>G. candidum</i> 870               | 0,00000  | 0,00000 | 0,00000 |
|     | <i>G. candidum</i> 832               | 5,90000  | 1,21244 | 0,70000 |
|     | <i>G. candidum</i> 1053              | 0,00000  | 0,00000 | 0,00000 |
|     | <i>G. candidum</i> 1061              | 0,00000  | 0,00000 | 0,00000 |
| L32 | <i>Candida krusei</i> 600            | 12,76667 | 0,64291 | 0,37118 |
|     | <i>C. inconspicua</i> 601            | 11,46667 | 0,65064 | 0,37565 |
|     | <i>C. parapsilosis</i> 612           | 10,83333 | 0,35119 | 0,20276 |
|     | <i>C. intermedia</i> 622             | 10,10000 | 0,81854 | 0,47258 |
|     | <i>C. apicola</i> 620                | 0,00000  | 0,00000 | 0,00000 |
|     | <i>C. zeylanoides</i> 623            | 8,50000  | 0,10000 | 0,05774 |
|     | <i>C. atlantica</i> 611              | 0,00000  | 0,00000 | 0,00000 |
|     | <i>Trichosporon asahii</i> 624       | 0,00000  | 0,00000 | 0,00000 |
|     | <i>T. domesticum</i> 1062            | 4,50000  | 0,30000 | 0,17321 |
|     | <i>T. coremiiforme</i> 607           | 0,00000  | 0,00000 | 0,00000 |
|     | <i>T. coremiiforme</i> 608           | 0,00000  | 0,00000 | 0,00000 |
|     | <i>Debaryomyces subglobosus</i> 2027 | 0,00000  | 0,00000 | 0,00000 |
|     | <i>D. hansenii</i> 742               | 7,76667  | 0,55076 | 0,31798 |
|     | <i>D. hansenii</i> 615               | 6,53333  | 0,83267 | 0,48074 |
|     | <i>D. hansenii</i> 47                | 8,13333  | 0,56862 | 0,32830 |
|     | <i>Kluyveromyces lactis</i> 1054     | 5,23333  | 0,45092 | 0,26034 |
|     | <i>K. lactis</i> 617                 | 0,00000  | 0,00000 | 0,00000 |
|     | <i>K. marxianus</i> 620              | 0,00000  | 0,00000 | 0,00000 |
|     | <i>K. marxianus</i> 270              | 6,70000  | 0,55678 | 0,32146 |
|     | <i>K. marxianus</i> 258              | 5,33333  | 0,32146 | 0,18559 |
|     | <i>Geotrichum candidum</i> 878       | 0,00000  | 0,00000 | 0,00000 |
|     | <i>G. candidum</i> 870               | 0,00000  | 0,00000 | 0,00000 |
|     | <i>G. candidum</i> 832               | 5,26667  | 0,45092 | 0,26034 |
|     | <i>G. candidum</i> 1053              | 5,36667  | 0,30551 | 0,17638 |
|     | <i>G. candidum</i> 1061              | 0,00000  | 0,00000 | 0,00000 |
| 381 | <i>Candida krusei</i> 600            | 11,63333 | 0,45092 | 0,26034 |
|     | <i>C. inconspicua</i> 601            | 10,26667 | 0,58595 | 0,33830 |
|     | <i>C. parapsilosis</i> 612           | 12,26667 | 0,50332 | 0,29059 |
|     | <i>C. intermedia</i> 622             | 12,43333 | 0,40415 | 0,23333 |

|     |                                      |          |         |         |
|-----|--------------------------------------|----------|---------|---------|
|     | <i>C. apicola</i> 620                | 10,43333 | 0,40415 | 0,23333 |
|     | <i>C. zeylanoides</i> 623            | 8,56667  | 2,10079 | 1,21289 |
|     | <i>C. atlantica</i> 611              | 10,30000 | 0,62450 | 0,36056 |
|     | <i>Trichosporon asahii</i> 624       | 0,00000  | 0,00000 | 0,00000 |
|     | <i>T. domesticum</i> 1062            | 0,00000  | 0,00000 | 0,00000 |
|     | <i>T. coremiiforme</i> 607           | 0,00000  | 0,00000 | 0,00000 |
|     | <i>T. coremiiforme</i> 608           | 0,00000  | 0,00000 | 0,00000 |
|     | <i>Debaryomyces subglobosus</i> 2027 | 0,00000  | 0,00000 | 0,00000 |
|     | <i>D. hansenii</i> 742               | 3,66667  | 3,18172 | 1,83697 |
|     | <i>D. hansenii</i> 615               | 5,50000  | 0,75498 | 0,43589 |
|     | <i>D. hansenii</i> 47                | 6,76667  | 1,78979 | 1,03333 |
|     | <i>Kluyveromyces lactis</i> 1054     | 7,40000  | 1,63707 | 0,94516 |
|     | <i>K. lactis</i> 617                 | 2,73333  | 4,73427 | 2,73333 |
|     | <i>K. marxianus</i> 620              | 0,00000  | 0,00000 | 0,00000 |
|     | <i>K. marxianus</i> 270              | 5,76667  | 1,34288 | 0,77531 |
|     | <i>K. marxianus</i> 258              | 6,63333  | 0,15275 | 0,08819 |
|     | <i>Geotrichum candidum</i> 878       | 5,16667  | 0,35119 | 0,20276 |
|     | <i>G. candidum</i> 870               | 0,00000  | 0,00000 | 0,00000 |
|     | <i>G. candidum</i> 832               | 6,76667  | 0,45092 | 0,26034 |
|     | <i>G. candidum</i> 1053              | 4,76667  | 0,37859 | 0,21858 |
|     | <i>G. candidum</i> 1061              | 0,00000  | 0,00000 | 0,00000 |
| 383 | <i>Candida krusei</i> 600            | 12,53333 | 0,25166 | 0,14530 |
|     | <i>C. inconspicua</i> 601            | 11,30000 | 0,43589 | 0,25166 |
|     | <i>C. parapsilosis</i> 612           | 13,23333 | 0,60277 | 0,34801 |
|     | <i>C. intermedia</i> 622             | 12,53333 | 0,25166 | 0,14530 |
|     | <i>C. apicola</i> 620                | 11,41667 | 0,45369 | 0,26194 |
|     | <i>C. zeylanoides</i> 623            | 8,26667  | 0,58595 | 0,33830 |
|     | <i>C. atlantica</i> 611              | 7,10000  | 0,75498 | 0,43589 |
|     | <i>Trichosporon asahii</i> 624       | 0,00000  | 0,00000 | 0,00000 |
|     | <i>T. domesticum</i> 1062            | 0,00000  | 0,00000 | 0,00000 |
|     | <i>T. coremiiforme</i> 607           | 4,53333  | 0,66583 | 0,38442 |
|     | <i>T. coremiiforme</i> 608           | 0,00000  | 0,00000 | 0,00000 |
|     | <i>Debaryomyces subglobosus</i> 2027 | 1,76667  | 3,05996 | 1,76667 |
|     | <i>D. hansenii</i> 742               | 3,66667  | 3,25167 | 1,87735 |
|     | <i>D. hansenii</i> 615               | 1,33333  | 2,30940 | 1,33333 |
|     | <i>D. hansenii</i> 47                | 5,83333  | 1,45717 | 0,84130 |
|     | <i>Kluyveromyces lactis</i> 1054     | 9,13333  | 0,92916 | 0,53645 |
|     | <i>K. lactis</i> 617                 | 5,63667  | 0,53575 | 0,30932 |
|     | <i>K. marxianus</i> 620              | 0,00000  | 0,00000 | 0,00000 |
|     | <i>K. marxianus</i> 270              | 5,56667  | 1,09697 | 0,63333 |
|     | <i>K. marxianus</i> 258              | 6,03333  | 1,07858 | 0,62272 |
|     | <i>Geotrichum candidum</i> 878       | 4,86667  | 0,58595 | 0,33830 |
|     | <i>G. candidum</i> 870               | 0,00000  | 0,00000 | 0,00000 |
|     | <i>G. candidum</i> 832               | 5,10000  | 0,81854 | 0,47258 |

|     |                                      |          |         |         |
|-----|--------------------------------------|----------|---------|---------|
|     | <i>G. candidum</i> 1053              | 0,00000  | 0,00000 | 0,00000 |
|     | <i>G. candidum</i> 1061              | 0,00000  | 0,00000 | 0,00000 |
| 384 | <i>Candida krusei</i> 600            | 12,93333 | 0,51316 | 0,29627 |
|     | <i>C. inconspicua</i> 601            | 11,73333 | 0,45092 | 0,26034 |
|     | <i>C. parapsilosis</i> 612           | 13,21667 | 0,40104 | 0,23154 |
|     | <i>C. intermedia</i> 622             | 12,63333 | 0,49329 | 0,28480 |
|     | <i>C. apicola</i> 620                | 15,06667 | 0,64291 | 0,37118 |
|     | <i>C. zeylanoides</i> 623            | 8,10000  | 0,55678 | 0,32146 |
|     | <i>C. atlantica</i> 611              | 10,70000 | 0,17321 | 0,10000 |
|     | <i>Trichosporon asahii</i> 624       | 0,00000  | 0,00000 | 0,00000 |
|     | <i>T. domesticum</i> 1062            | 6,00000  | 2,02978 | 1,17189 |
|     | <i>T. coremiiforme</i> 607           | 4,96667  | 0,58595 | 0,33830 |
|     | <i>T. coremiiforme</i> 608           | 0,00000  | 0,00000 | 0,00000 |
|     | <i>Debaryomyces subglobosus</i> 2027 | 0,00000  | 0,00000 | 0,00000 |
|     | <i>D. hansenii</i> 742               | 5,16667  | 0,32146 | 0,18559 |
|     | <i>D. hansenii</i> 615               | 0,00000  | 0,00000 | 0,00000 |
|     | <i>D. hansenii</i> 47                | 5,43333  | 1,09697 | 0,63333 |
|     | <i>Kluyveromyces lactis</i> 1054     | 8,33333  | 1,02632 | 0,59255 |
|     | <i>K. lactis</i> 617                 | 0,00000  | 0,00000 | 0,00000 |
|     | <i>K. marxianus</i> 620              | 0,00000  | 0,00000 | 0,00000 |
|     | <i>K. marxianus</i> 270              | 4,66667  | 0,80829 | 0,46667 |
|     | <i>K. marxianus</i> 258              | 0,00000  | 0,00000 | 0,00000 |
|     | <i>Geotrichum candidum</i> 878       | 0,00000  | 0,00000 | 0,00000 |
|     | <i>G. candidum</i> 870               | 0,00000  | 0,00000 | 0,00000 |
|     | <i>G. candidum</i> 832               | 5,10000  | 0,26458 | 0,15275 |
|     | <i>G. candidum</i> 1053              | 0,00000  | 0,00000 | 0,00000 |
|     | <i>G. candidum</i> 1061              | 0,00000  | 0,00000 | 0,00000 |
| 391 | <i>Candida krusei</i> 600            | 12,21667 | 0,40104 | 0,23154 |
|     | <i>C. inconspicua</i> 601            | 11,76667 | 0,45092 | 0,26034 |
|     | <i>C. parapsilosis</i> 612           | 12,33333 | 0,50332 | 0,29059 |
|     | <i>C. intermedia</i> 622             | 12,90000 | 0,45826 | 0,26458 |
|     | <i>C. apicola</i> 620                | 10,43333 | 0,32146 | 0,18559 |
|     | <i>C. zeylanoides</i> 623            | 9,26667  | 1,06927 | 0,61734 |
|     | <i>C. atlantica</i> 611              | 10,83333 | 0,65064 | 0,37565 |
|     | <i>Trichosporon asahii</i> 624       | 0,00000  | 0,00000 | 0,00000 |
|     | <i>T. domesticum</i> 1062            | 4,86667  | 0,58595 | 0,33830 |
|     | <i>T. coremiiforme</i> 607           | 0,00000  | 0,00000 | 0,00000 |
|     | <i>T. coremiiforme</i> 608           | 0,00000  | 0,00000 | 0,00000 |
|     | <i>Debaryomyces subglobosus</i> 2027 | 0,00000  | 0,00000 | 0,00000 |
|     | <i>D. hansenii</i> 742               | 8,20000  | 0,79373 | 0,45826 |
|     | <i>D. hansenii</i> 615               | 7,16667  | 0,41633 | 0,24037 |
|     | <i>D. hansenii</i> 47                | 7,93333  | 0,58595 | 0,33830 |
|     | <i>Kluyveromyces lactis</i> 1054     | 10,96667 | 0,66583 | 0,38442 |
|     | <i>K. lactis</i> 617                 | 7,00000  | 0,43589 | 0,25166 |

|       |                                      |          |         |         |
|-------|--------------------------------------|----------|---------|---------|
|       | <i>K. marxianus</i> 620              | 6,86667  | 0,40415 | 0,23333 |
|       | <i>K. marxianus</i> 270              | 7,80000  | 0,87178 | 0,50332 |
|       | <i>K. marxianus</i> 258              | 9,86667  | 0,30551 | 0,17638 |
|       | <i>Geotrichum candidum</i> 878       | 6,26667  | 0,98658 | 0,56960 |
|       | <i>G. candidum</i> 870               | 0,00000  | 0,00000 | 0,00000 |
|       | <i>G. candidum</i> 832               | 5,76667  | 0,55076 | 0,31798 |
|       | <i>G. candidum</i> 1053              | 0,00000  | 0,00000 | 0,00000 |
|       | <i>G. candidum</i> 1061              | 0,00000  | 0,00000 | 0,00000 |
| 387   | <i>Candida krusei</i> 600            | 12,33333 | 0,45092 | 0,26034 |
|       | <i>C. inconspicua</i> 601            | 11,26667 | 0,50332 | 0,29059 |
|       | <i>C. parapsilosis</i> 612           | 12,73333 | 0,40415 | 0,23333 |
|       | <i>C. intermedia</i> 622             | 12,63333 | 0,28868 | 0,16667 |
|       | <i>C. apicola</i> 620                | 10,53333 | 0,30551 | 0,17638 |
|       | <i>C. zeylanoides</i> 623            | 9,23333  | 0,83865 | 0,48419 |
|       | <i>C. atlantica</i> 611              | 10,70000 | 0,17321 | 0,10000 |
|       | <i>Trichosporon asahii</i> 624       | 0,00000  | 0,00000 | 0,00000 |
|       | <i>T. domesticum</i> 1062            | 5,26667  | 0,30551 | 0,17638 |
|       | <i>T. coremiiforme</i> 607           | 0,00000  | 0,00000 | 0,00000 |
|       | <i>T. coremiiforme</i> 608           | 0,00000  | 0,00000 | 0,00000 |
|       | <i>Debaryomyces subglobosus</i> 2027 | 0,00000  | 0,00000 | 0,00000 |
|       | <i>D. hansenii</i> 742               | 7,06667  | 1,33167 | 0,76884 |
|       | <i>D. hansenii</i> 615               | 5,30000  | 0,10000 | 0,05774 |
|       | <i>D. hansenii</i> 47                | 9,76667  | 1,78979 | 1,03333 |
|       | <i>Kluyveromyces lactis</i> 1054     | 10,96667 | 0,66583 | 0,38442 |
|       | <i>K. lactis</i> 617                 | 6,53333  | 0,75056 | 0,43333 |
|       | <i>K. marxianus</i> 620              | 0,00000  | 0,00000 | 0,00000 |
|       | <i>K. marxianus</i> 270              | 4,76667  | 0,55076 | 0,31798 |
|       | <i>K. marxianus</i> 258              | 5,46667  | 0,25166 | 0,14530 |
|       | <i>Geotrichum candidum</i> 878       | 6,66667  | 0,15275 | 0,08819 |
|       | <i>G. candidum</i> 870               | 0,00000  | 0,00000 | 0,00000 |
|       | <i>G. candidum</i> 832               | 0,00000  | 0,00000 | 0,00000 |
|       | <i>G. candidum</i> 1053              | 0,00000  | 0,00000 | 0,00000 |
|       | <i>G. candidum</i> 1061              | 0,00000  | 0,00000 | 0,00000 |
| K19-1 | <i>Candida krusei</i> 600            | 5,53333  | 0,61101 | 0,35277 |
|       | <i>C. inconspicua</i> 601            | 6,10000  | 0,81854 | 0,47258 |
|       | <i>C. parapsilosis</i> 612           | 5,73333  | 0,50332 | 0,29059 |
|       | <i>C. intermedia</i> 622             | 5,50000  | 0,30000 | 0,17321 |
|       | <i>C. apicola</i> 620                | 0,00000  | 0,00000 | 0,00000 |
|       | <i>C. zeylanoides</i> 623            | 5,96667  | 0,66583 | 0,38442 |
|       | <i>C. atlantica</i> 611              | 0,00000  | 0,00000 | 0,00000 |
|       | <i>Trichosporon asahii</i> 624       | 0,00000  | 0,00000 | 0,00000 |
|       | <i>T. domesticum</i> 1062            | 9,66667  | 0,72169 | 0,41667 |
|       | <i>T. coremiiforme</i> 607           | 10,73333 | 0,45092 | 0,26034 |
|       | <i>T. coremiiforme</i> 608           | 10,33333 | 0,15275 | 0,08819 |

|       |                                      |          |         |         |
|-------|--------------------------------------|----------|---------|---------|
|       | <i>Debaryomyces subglobosus</i> 2027 | 0,00000  | 0,00000 | 0,00000 |
|       | <i>D. hansenii</i> 742               | 5,30000  | 0,55678 | 0,32146 |
|       | <i>D. hansenii</i> 615               | 6,50000  | 0,88882 | 0,51316 |
|       | <i>D. hansenii</i> 47                | 0,00000  | 0,00000 | 0,00000 |
|       | <i>Kluyveromyces lactis</i> 1054     | 6,76667  | 0,45092 | 0,26034 |
|       | <i>K. lactis</i> 617                 | 5,36667  | 0,28868 | 0,16667 |
|       | <i>K. marxianus</i> 620              | 5,30000  | 0,10000 | 0,05774 |
|       | <i>K. marxianus</i> 270              | 6,26667  | 0,55076 | 0,31798 |
|       | <i>K. marxianus</i> 258              | 5,43333  | 0,25166 | 0,14530 |
|       | <i>Geotrichum candidum</i> 878       | 6,11667  | 0,79110 | 0,45674 |
|       | <i>G. candidum</i> 870               | 5,60000  | 0,36056 | 0,20817 |
|       | <i>G. candidum</i> 832               | 7,06667  | 0,70946 | 0,40961 |
|       | <i>G. candidum</i> 1053              | 5,40000  | 0,10000 | 0,05774 |
|       | <i>G. candidum</i> 1061              | 0,00000  | 0,00000 | 0,00000 |
| K19-2 | <i>Candida krusei</i> 600            | 10,33333 | 0,15275 | 0,08819 |
|       | <i>C. inconspicua</i> 601            | 0,00000  | 0,00000 | 0,00000 |
|       | <i>C. parapsilosis</i> 612           | 0,00000  | 0,00000 | 0,00000 |
|       | <i>C. intermedia</i> 622             | 0,00000  | 0,00000 | 0,00000 |
|       | <i>C. apicola</i> 620                | 0,00000  | 0,00000 | 0,00000 |
|       | <i>C. zeylanoides</i> 623            | 7,86667  | 0,30551 | 0,17638 |
|       | <i>C. atlantica</i> 611              | 0,00000  | 0,00000 | 0,00000 |
|       | <i>Trichosporon asahii</i> 624       | 0,00000  | 0,00000 | 0,00000 |
|       | <i>T. domesticum</i> 1062            | 8,31667  | 0,35473 | 0,20480 |
|       | <i>T. coremiiforme</i> 607           | 8,40000  | 0,81854 | 0,47258 |
|       | <i>T. coremiiforme</i> 608           | 8,16667  | 0,49329 | 0,28480 |
|       | <i>Debaryomyces subglobosus</i> 2027 | 0,00000  | 0,00000 | 0,00000 |
|       | <i>D. hansenii</i> 742               | 5,10000  | 0,75498 | 0,43589 |
|       | <i>D. hansenii</i> 615               | 4,43333  | 0,40415 | 0,23333 |
|       | <i>D. hansenii</i> 47                | 5,40000  | 0,26458 | 0,15275 |
|       | <i>Kluyveromyces lactis</i> 1054     | 9,00000  | 1,37477 | 0,79373 |
|       | <i>K. lactis</i> 617                 | 8,40000  | 0,10000 | 0,05774 |
|       | <i>K. marxianus</i> 620              | 8,13333  | 0,56862 | 0,32830 |
|       | <i>K. marxianus</i> 270              | 8,83333  | 0,32146 | 0,18559 |
|       | <i>K. marxianus</i> 258              | 8,86667  | 0,35119 | 0,20276 |
|       | <i>Geotrichum candidum</i> 878       | 5,10000  | 0,55678 | 0,32146 |
|       | <i>G. candidum</i> 870               | 0,00000  | 0,00000 | 0,00000 |
|       | <i>G. candidum</i> 832               | 5,10000  | 0,81854 | 0,47258 |
|       | <i>G. candidum</i> 1053              | 0,00000  | 0,00000 | 0,00000 |
|       | <i>G. candidum</i> 1061              | 0,00000  | 0,00000 | 0,00000 |
| K19-3 | <i>Candida krusei</i> 600            | 0,00000  | 0,00000 | 0,00000 |
|       | <i>C. inconspicua</i> 601            | 0,00000  | 0,00000 | 0,00000 |
|       | <i>C. parapsilosis</i> 612           | 0,00000  | 0,00000 | 0,00000 |
|       | <i>C. intermedia</i> 622             | 8,40000  | 0,26458 | 0,15275 |
|       | <i>C. apicola</i> 620                | 0,00000  | 0,00000 | 0,00000 |



|       |                                      |          |         |         |
|-------|--------------------------------------|----------|---------|---------|
|       | <i>C. zeylanoides</i> 623            | 0,00000  | 0,00000 | 0,00000 |
|       | <i>C. atlantica</i> 611              | 0,00000  | 0,00000 | 0,00000 |
|       | <i>Trichosporon asahii</i> 624       | 0,00000  | 0,00000 | 0,00000 |
|       | <i>T. domesticum</i> 1062            | 5,13333  | 0,56862 | 0,32830 |
|       | <i>T. coremiiforme</i> 607           | 4,70000  | 3,90000 | 2,25167 |
|       | <i>T. coremiiforme</i> 608           | 7,65667  | 0,55194 | 0,31866 |
|       | <i>Debaryomyces subglobosus</i> 2027 | 0,00000  | 0,00000 | 0,00000 |
|       | <i>D. hansenii</i> 742               | 0,00000  | 0,00000 | 0,00000 |
|       | <i>D. hansenii</i> 615               | 0,00000  | 0,00000 | 0,00000 |
|       | <i>D. hansenii</i> 47                | 6,33333  | 1,15036 | 0,66416 |
|       | <i>Kluyveromyces lactis</i> 1054     | 6,76667  | 1,26623 | 0,73106 |
|       | <i>K. lactis</i> 617                 | 6,40000  | 2,00749 | 1,15902 |
|       | <i>K. marxianus</i> 620              | 5,60000  | 0,26458 | 0,15275 |
|       | <i>K. marxianus</i> 270              | 6,76667  | 0,55076 | 0,31798 |
|       | <i>K. marxianus</i> 258              | 6,46667  | 1,25033 | 0,72188 |
|       | <i>Geotrichum candidum</i> 878       | 7,66667  | 0,47258 | 0,27285 |
|       | <i>G. candidum</i> 870               | 0,00000  | 0,00000 | 0,00000 |
|       | <i>G. candidum</i> 832               | 6,10000  | 0,75498 | 0,43589 |
|       | <i>G. candidum</i> 1053              | 0,00000  | 0,00000 | 0,00000 |
|       | <i>G. candidum</i> 1061              | 0,00000  | 0,00000 | 0,00000 |
| K20-4 | <i>Candida krusei</i> 600            | 14,11667 | 0,27538 | 0,15899 |
|       | <i>C. inconspicua</i> 601            | 11,83333 | 0,35119 | 0,20276 |
|       | <i>C. parapsilosis</i> 612           | 10,23333 | 0,25166 | 0,14530 |
|       | <i>C. intermedia</i> 622             | 14,90000 | 0,36056 | 0,20817 |
|       | <i>C. apicola</i> 620                | 0,00000  | 0,00000 | 0,00000 |
|       | <i>C. zeylanoides</i> 623            | 6,43333  | 0,72342 | 0,41767 |
|       | <i>C. atlantica</i> 611              | 0,00000  | 0,00000 | 0,00000 |
|       | <i>Trichosporon asahii</i> 624       | 0,00000  | 0,00000 | 0,00000 |
|       | <i>T. domesticum</i> 1062            | 9,58333  | 0,53463 | 0,30867 |
|       | <i>T. coremiiforme</i> 607           | 6,76667  | 0,45092 | 0,26034 |
|       | <i>T. coremiiforme</i> 608           | 7,26667  | 0,68069 | 0,39299 |
|       | <i>Debaryomyces subglobosus</i> 2027 | 0,00000  | 0,00000 | 0,00000 |
|       | <i>D. hansenii</i> 742               | 5,91667  | 0,24664 | 0,14240 |
|       | <i>D. hansenii</i> 615               | 0,00000  | 0,00000 | 0,00000 |
|       | <i>D. hansenii</i> 47                | 7,23333  | 0,95044 | 0,54874 |
|       | <i>Kluyveromyces lactis</i> 1054     | 9,43333  | 0,80208 | 0,46308 |
|       | <i>K. lactis</i> 617                 | 11,16667 | 0,61101 | 0,35277 |
|       | <i>K. marxianus</i> 620              | 11,80000 | 0,50000 | 0,28868 |
|       | <i>K. marxianus</i> 270              | 12,40000 | 0,10000 | 0,05774 |
|       | <i>K. marxianus</i> 258              | 11,50000 | 1,11355 | 0,64291 |
|       | <i>Geotrichum candidum</i> 878       | 12,70000 | 0,55678 | 0,32146 |
|       | <i>G. candidum</i> 870               | 12,30000 | 0,43589 | 0,25166 |
|       | <i>G. candidum</i> 832               | 11,83333 | 0,25166 | 0,14530 |
|       | <i>G. candidum</i> 1053              | 10,33333 | 0,15275 | 0,08819 |

|          |                                      |          |         |         |
|----------|--------------------------------------|----------|---------|---------|
|          | <i>G. candidum</i> 1061              | 10,73333 | 0,41633 | 0,24037 |
| 3018     | <i>Candida krusei</i> 600            | 10,16667 | 0,35119 | 0,20276 |
|          | <i>C. inconspicua</i> 601            | 10,43333 | 0,80208 | 0,46308 |
|          | <i>C. parapsilosis</i> 612           | 0,00000  | 0,00000 | 0,00000 |
|          | <i>C. intermedia</i> 622             | 0,00000  | 0,00000 | 0,00000 |
|          | <i>C. apicola</i> 620                | 0,00000  | 0,00000 | 0,00000 |
|          | <i>C. zeylanoides</i> 623            | 7,66667  | 0,47258 | 0,27285 |
|          | <i>C. atlantica</i> 611              | 0,00000  | 0,00000 | 0,00000 |
|          | <i>Trichosporon asahii</i> 624       | 0,00000  | 0,00000 | 0,00000 |
|          | <i>T. domesticum</i> 1062            | 0,00000  | 0,00000 | 0,00000 |
|          | <i>T. coremiiforme</i> 607           | 0,00000  | 0,00000 | 0,00000 |
|          | <i>T. coremiiforme</i> 608           | 0,00000  | 0,00000 | 0,00000 |
|          | <i>Debaryomyces subglobosus</i> 2027 | 0,00000  | 0,00000 | 0,00000 |
|          | <i>D. hansenii</i> 742               | 5,50000  | 0,26458 | 0,15275 |
|          | <i>D. hansenii</i> 615               | 0,00000  | 0,00000 | 0,00000 |
|          | <i>D. hansenii</i> 47                | 5,83333  | 0,61101 | 0,35277 |
|          | <i>Kluyveromyces lactis</i> 1054     | 5,70000  | 1,15326 | 0,66583 |
|          | <i>K. lactis</i> 617                 | 0,00000  | 0,00000 | 0,00000 |
|          | <i>K. marxianus</i> 620              | 0,00000  | 0,00000 | 0,00000 |
|          | <i>K. marxianus</i> 270              | 0,00000  | 0,00000 | 0,00000 |
|          | <i>K. marxianus</i> 258              | 0,00000  | 0,00000 | 0,00000 |
|          | <i>Geotrichum candidum</i> 878       | 5,13333  | 0,30551 | 0,17638 |
|          | <i>G. candidum</i> 870               | 0,00000  | 0,00000 | 0,00000 |
|          | <i>G. candidum</i> 832               | 0,00000  | 0,00000 | 0,00000 |
|          | <i>G. candidum</i> 1053              | 0,00000  | 0,00000 | 0,00000 |
|          | <i>G. candidum</i> 1061              | 3,76667  | 6,52406 | 3,76667 |
| controls | <i>Candida krusei</i> 600            | 17,03333 | 0,40415 | 0,23333 |
|          | <i>C. inconspicua</i> 601            | 16,30000 | 0,10000 | 0,05774 |
|          | <i>C. parapsilosis</i> 612           | 15,70000 | 0,10000 | 0,05774 |
|          | <i>C. intermedia</i> 622             | 15,30000 | 0,10000 | 0,05774 |
|          | <i>C. apicola</i> 620                | 14,60000 | 0,26458 | 0,15275 |
|          | <i>C. zeylanoides</i> 623            | 21,13333 | 0,28868 | 0,16667 |
|          | <i>C. atlantica</i> 611              | 17,26667 | 0,05774 | 0,03333 |
|          | <i>Trichosporon asahii</i> 624       | 21,50000 | 0,26458 | 0,15275 |
|          | <i>T. domesticum</i> 1062            | 15,66667 | 0,55076 | 0,31798 |
|          | <i>T. coremiiforme</i> 607           | 16,66667 | 0,15275 | 0,08819 |
|          | <i>T. coremiiforme</i> 608           | 20,50000 | 0,20000 | 0,11547 |
|          | <i>Debaryomyces subglobosus</i> 2027 | 14,96667 | 0,56862 | 0,32830 |
|          | <i>D. hansenii</i> 742               | 16,10000 | 0,26458 | 0,15275 |
|          | <i>D. hansenii</i> 615               | 15,36667 | 0,49329 | 0,28480 |
|          | <i>D. hansenii</i> 47                | 18,36667 | 0,51316 | 0,29627 |
|          | <i>Kluyveromyces lactis</i> 1054     | 21,16667 | 1,15902 | 0,66916 |
|          | <i>K. lactis</i> 617                 | 18,66667 | 0,15275 | 0,08819 |
|          | <i>K. marxianus</i> 620              | 20,20000 | 0,36056 | 0,20817 |

|  |                                |          |         |         |
|--|--------------------------------|----------|---------|---------|
|  | <i>K. marxianus</i> 270        | 19,63333 | 1,00664 | 0,58119 |
|  | <i>K. marxianus</i> 258        | 20,80000 | 0,43589 | 0,25166 |
|  | <i>Geotrichum candidum</i> 878 | 20,30000 | 0,20000 | 0,11547 |
|  | <i>G. candidum</i> 870         | 20,53333 | 0,80208 | 0,46308 |
|  | <i>G. candidum</i> 832         | 18,96667 | 2,14554 | 1,23873 |
|  | <i>G. candidum</i> 1053        | 15,56667 | 0,32146 | 0,18559 |
|  | <i>G. candidum</i> 1061        | 15,56667 | 0,55076 | 0,31798 |



| <b>Table S4</b> The variability of yeast colony average (mm) characterised by mean, standard deviation (s.d.) and standard error of means (s.e.m.). The data resulted from Factorial ANOVA, Statistica 12v., Significant at $\alpha \leq 0.05$ . |                                      |          |         |         |
|--------------------------------------------------------------------------------------------------------------------------------------------------------------------------------------------------------------------------------------------------|--------------------------------------|----------|---------|---------|
| <i>L. plantarum</i> strains                                                                                                                                                                                                                      | yeast                                | mean     | s.d.    | s.e.m.  |
| 191                                                                                                                                                                                                                                              | <i>Candida krusei</i> 600            | 24,08333 | 1,18145 | 0,68211 |
|                                                                                                                                                                                                                                                  | <i>C. inconspicua</i> 601            | 11,50000 | 1,00000 | 0,57735 |
|                                                                                                                                                                                                                                                  | <i>C. parapsilosis</i> 612           | 15,43333 | 0,81445 | 0,47022 |
|                                                                                                                                                                                                                                                  | <i>C. intermedia</i> 622             | 14,00000 | 1,11355 | 0,64291 |
|                                                                                                                                                                                                                                                  | <i>C. apicola</i> 620                | 0,00000  | 0,00000 | 0,00000 |
|                                                                                                                                                                                                                                                  | <i>C. zeylanoides</i> 623            | 9,41667  | 0,62915 | 0,36324 |
|                                                                                                                                                                                                                                                  | <i>C. atlantica</i> 611              | 0,00000  | 0,00000 | 0,00000 |
|                                                                                                                                                                                                                                                  | <i>Trichosporon asahii</i> 624       | 0,00000  | 0,00000 | 0,00000 |
|                                                                                                                                                                                                                                                  | <i>T. domesticum</i> 1062            | 11,36667 | 0,77675 | 0,44845 |
|                                                                                                                                                                                                                                                  | <i>T. coremiiforme</i> 607           | 14,16667 | 0,90738 | 0,52387 |
|                                                                                                                                                                                                                                                  | <i>T. coremiiforme</i> 608           | 6,86667  | 1,70098 | 0,98206 |
|                                                                                                                                                                                                                                                  | <i>Debaryomyces subglobosus</i> 2027 | 0,00000  | 0,00000 | 0,00000 |
|                                                                                                                                                                                                                                                  | <i>D. hansenii</i> 742               | 0,00000  | 0,00000 | 0,00000 |
|                                                                                                                                                                                                                                                  | <i>D. hansenii</i> 615               | 0,00000  | 0,00000 | 0,00000 |
|                                                                                                                                                                                                                                                  | <i>D. hansenii</i> 47                | 0,00000  | 0,00000 | 0,00000 |
|                                                                                                                                                                                                                                                  | <i>Kluyveromyces lactis</i> 1054     | 11,20000 | 0,96437 | 0,55678 |
|                                                                                                                                                                                                                                                  | <i>K. lactis</i> 617                 | 6,26667  | 5,50121 | 3,17613 |
|                                                                                                                                                                                                                                                  | <i>K. marxianus</i> 620              | 9,03333  | 1,98578 | 1,14649 |
|                                                                                                                                                                                                                                                  | <i>K. marxianus</i> 270              | 11,20000 | 0,95394 | 0,55076 |
|                                                                                                                                                                                                                                                  | <i>K. marxianus</i> 258              | 10,40000 | 1,95192 | 1,12694 |
|                                                                                                                                                                                                                                                  | <i>Geotrichum candidum</i> 878       | 4,50000  | 0,70000 | 0,40415 |
|                                                                                                                                                                                                                                                  | <i>G. candidum</i> 870               | 0,83333  | 1,44338 | 0,83333 |
|                                                                                                                                                                                                                                                  | <i>G. candidum</i> 832               | 8,83333  | 2,63122 | 1,51914 |
|                                                                                                                                                                                                                                                  | <i>G. candidum</i> 1053              | 8,63333  | 3,56978 | 2,06101 |
|                                                                                                                                                                                                                                                  | <i>G. candidum</i> 1061              | 11,33333 | 1,62891 | 0,94045 |
| 196                                                                                                                                                                                                                                              | <i>Candida krusei</i> 600            | 25,28333 | 1,10265 | 0,63661 |
|                                                                                                                                                                                                                                                  | <i>C. inconspicua</i> 601            | 10,73333 | 1,36504 | 0,78811 |
|                                                                                                                                                                                                                                                  | <i>C. parapsilosis</i> 612           | 10,68333 | 1,53324 | 0,88522 |
|                                                                                                                                                                                                                                                  | <i>C. intermedia</i> 622             | 9,58333  | 1,25831 | 0,72648 |
|                                                                                                                                                                                                                                                  | <i>C. apicola</i> 620                | 0,00000  | 0,00000 | 0,00000 |
|                                                                                                                                                                                                                                                  | <i>C. zeylanoides</i> 623            | 8,63333  | 0,51316 | 0,29627 |
|                                                                                                                                                                                                                                                  | <i>C. atlantica</i> 611              | 0,00000  | 0,00000 | 0,00000 |
|                                                                                                                                                                                                                                                  | <i>Trichosporon asahii</i> 624       | 0,00000  | 0,00000 | 0,00000 |
|                                                                                                                                                                                                                                                  | <i>T. domesticum</i> 1062            | 8,41667  | 1,70612 | 0,98503 |
|                                                                                                                                                                                                                                                  | <i>T. coremiiforme</i> 607           | 14,20000 | 1,40000 | 0,80829 |
|                                                                                                                                                                                                                                                  | <i>T. coremiiforme</i> 608           | 10,23333 | 2,05020 | 1,18369 |
|                                                                                                                                                                                                                                                  | <i>Debaryomyces subglobosus</i> 2027 | 0,00000  | 0,00000 | 0,00000 |
|                                                                                                                                                                                                                                                  | <i>D. hansenii</i> 742               | 11,50000 | 0,91652 | 0,52915 |
|                                                                                                                                                                                                                                                  | <i>D. hansenii</i> 615               | 3,33333  | 2,89367 | 1,67066 |

|     |                                      |          |         |         |
|-----|--------------------------------------|----------|---------|---------|
|     | <i>D. hansenii</i> 47                | 7,33333  | 0,85049 | 0,49103 |
|     | <i>Kluyveromyces lactis</i> 1054     | 9,85000  | 1,39374 | 0,80467 |
|     | <i>K. lactis</i> 617                 | 13,66667 | 1,36137 | 0,78599 |
|     | <i>K. marxianus</i> 620              | 12,66667 | 1,45717 | 0,84130 |
|     | <i>K. marxianus</i> 270              | 16,43333 | 0,70946 | 0,40961 |
|     | <i>K. marxianus</i> 258              | 17,40000 | 0,85440 | 0,49329 |
|     | <i>Geotrichum candidum</i> 878       | 4,93333  | 8,54478 | 4,93333 |
|     | <i>G. candidum</i> 870               | 3,33333  | 2,99555 | 1,72948 |
|     | <i>G. candidum</i> 832               | 6,43333  | 0,49329 | 0,28480 |
|     | <i>G. candidum</i> 1053              | 0,00000  | 0,00000 | 0,00000 |
|     | <i>G. candidum</i> 1061              | 8,56667  | 2,15484 | 1,24410 |
| 182 | <i>Candida krusei</i> 600            | 13,15000 | 0,91788 | 0,52994 |
|     | <i>C. inconspicua</i> 601            | 12,25000 | 0,43301 | 0,25000 |
|     | <i>C. parapsilosis</i> 612           | 8,83333  | 0,80364 | 0,46398 |
|     | <i>C. intermedia</i> 622             | 11,31667 | 0,98784 | 0,57033 |
|     | <i>C. apicola</i> 620                | 0,00000  | 0,00000 | 0,00000 |
|     | <i>C. zeylanoides</i> 623            | 7,75000  | 1,27574 | 0,73655 |
|     | <i>C. atlantica</i> 611              | 0,00000  | 0,00000 | 0,00000 |
|     | <i>Trichosporon asahii</i> 624       | 0,00000  | 0,00000 | 0,00000 |
|     | <i>T. domesticum</i> 1062            | 5,33333  | 0,50332 | 0,29059 |
|     | <i>T. coremiiforme</i> 607           | 7,20000  | 1,24900 | 0,72111 |
|     | <i>T. coremiiforme</i> 608           | 6,23333  | 0,55076 | 0,31798 |
|     | <i>Debaryomyces subglobosus</i> 2027 | 0,00000  | 0,00000 | 0,00000 |
|     | <i>D. hansenii</i> 742               | 9,10000  | 0,95394 | 0,55076 |
|     | <i>D. hansenii</i> 615               | 0,00000  | 0,00000 | 0,00000 |
|     | <i>D. hansenii</i> 47                | 0,00000  | 0,00000 | 0,00000 |
|     | <i>Kluyveromyces lactis</i> 1054     | 5,90000  | 0,81854 | 0,47258 |
|     | <i>K. lactis</i> 617                 | 5,60000  | 1,05830 | 0,61101 |
|     | <i>K. marxianus</i> 620              | 10,00000 | 1,37477 | 0,79373 |
|     | <i>K. marxianus</i> 270              | 8,36667  | 3,05669 | 1,76478 |
|     | <i>K. marxianus</i> 258              | 8,56667  | 0,85049 | 0,49103 |
|     | <i>Geotrichum candidum</i> 878       | 0,00000  | 0,00000 | 0,00000 |
|     | <i>G. candidum</i> 870               | 7,13333  | 1,23423 | 0,71259 |
|     | <i>G. candidum</i> 832               | 5,50000  | 4,76340 | 2,75015 |
|     | <i>G. candidum</i> 1053              | 1,86667  | 3,23316 | 1,86667 |
|     | <i>G. candidum</i> 1061              | 8,53333  | 0,70946 | 0,40961 |
| 185 | <i>Candida krusei</i> 600            | 6,91667  | 0,38188 | 0,22048 |
|     | <i>C. inconspicua</i> 601            | 9,48333  | 0,44814 | 0,25874 |
|     | <i>C. parapsilosis</i> 612           | 8,33333  | 0,47258 | 0,27285 |
|     | <i>C. intermedia</i> 622             | 10,06667 | 0,51316 | 0,29627 |
|     | <i>C. apicola</i> 620                | 0,00000  | 0,00000 | 0,00000 |
|     | <i>C. zeylanoides</i> 623            | 6,16667  | 0,85049 | 0,49103 |
|     | <i>C. atlantica</i> 611              | 0,00000  | 0,00000 | 0,00000 |
|     | <i>Trichosporon asahii</i> 624       | 0,00000  | 0,00000 | 0,00000 |

|     |                                      |          |          |          |
|-----|--------------------------------------|----------|----------|----------|
|     | <i>T. domesticum</i> 1062            | 8,20000  | 1,17898  | 0,68069  |
|     | <i>T. coremiiforme</i> 607           | 8,66667  | 0,56862  | 0,32830  |
|     | <i>T. coremiiforme</i> 608           | 9,20000  | 1,40000  | 0,80829  |
|     | <i>Debaryomyces subglobosus</i> 2027 | 0,00000  | 0,00000  | 0,00000  |
|     | <i>D. hansenii</i> 742               | 12,10000 | 1,21244  | 0,70000  |
|     | <i>D. hansenii</i> 615               | 1,73333  | 3,00222  | 1,73333  |
|     | <i>D. hansenii</i> 47                | 0,00000  | 0,00000  | 0,00000  |
|     | <i>Kluyveromyces lactis</i> 1054     | 8,63333  | 1,40119  | 0,80898  |
|     | <i>K. lactis</i> 617                 | 30,26667 | 36,15098 | 20,87178 |
|     | <i>K. marxianus</i> 620              | 11,33333 | 0,15275  | 0,08819  |
|     | <i>K. marxianus</i> 270              | 7,90000  | 0,30000  | 0,17321  |
|     | <i>K. marxianus</i> 258              | 9,16667  | 1,02632  | 0,59255  |
|     | <i>Geotrichum candidum</i> 878       | 0,00000  | 0,00000  | 0,00000  |
|     | <i>G. candidum</i> 870               | 7,06667  | 0,90738  | 0,52387  |
|     | <i>G. candidum</i> 832               | 6,90000  | 1,57162  | 0,90738  |
|     | <i>G. candidum</i> 1053              | 0,00000  | 0,00000  | 0,00000  |
|     | <i>G. candidum</i> 1061              | 10,56667 | 1,86100  | 1,07445  |
| 187 | <i>Candida krusei</i> 600            | 0,00000  | 0,00000  | 0,00000  |
|     | <i>C. inconspicua</i> 601            | 8,21667  | 0,36856  | 8,21667  |
|     | <i>C. parapsilosis</i> 612           | 0,00000  | 0,00000  | 0,00000  |
|     | <i>C. intermedia</i> 622             | 10,26667 | 0,47522  | 10,26667 |
|     | <i>C. apicola</i> 620                | 2,06250  | 4,12500  | 2,06250  |
|     | <i>C. zeylanoides</i> 623            | 9,20000  | 1,02632  | 9,20000  |
|     | <i>C. atlantica</i> 611              | 2,18750  | 4,37500  | 2,18750  |
|     | <i>Trichosporon asahii</i> 624       | 0,00000  | 0,00000  | 0,00000  |
|     | <i>T. domesticum</i> 1062            | 8,80000  | 1,30767  | 8,80000  |
|     | <i>T. coremiiforme</i> 607           | 8,40000  | 1,90000  | 8,40000  |
|     | <i>T. coremiiforme</i> 608           | 8,66667  | 0,47258  | 8,66667  |
|     | <i>Debaryomyces subglobosus</i> 2027 | 0,00000  | 0,00000  | 0,00000  |
|     | <i>D. hansenii</i> 742               | 12,10000 | 1,21244  | 12,10000 |
|     | <i>D. hansenii</i> 615               | 0,00000  | 0,00000  | 0,00000  |
|     | <i>D. hansenii</i> 47                | 6,10000  | 0,81854  | 6,10000  |
|     | <i>Kluyveromyces lactis</i> 1054     | 9,36667  | 0,76376  | 9,36667  |
|     | <i>K. lactis</i> 617                 | 10,80000 | 1,30000  | 10,80000 |
|     | <i>K. marxianus</i> 620              | 10,63333 | 3,88115  | 10,63333 |
|     | <i>K. marxianus</i> 270              | 7,73333  | 1,28582  | 7,73333  |
|     | <i>K. marxianus</i> 258              | 7,63333  | 1,06927  | 7,63333  |
|     | <i>Geotrichum candidum</i> 878       | 0,00000  | 0,00000  | 0,00000  |
|     | <i>G. candidum</i> 870               | 8,66667  | 0,47258  | 8,66667  |
|     | <i>G. candidum</i> 832               | 8,50000  | 1,21244  | 8,50000  |
|     | <i>G. candidum</i> 1053              | 0,00000  | 0,00000  | 0,00000  |
|     | <i>G. candidum</i> 1061              | 8,46667  | 0,90738  | 8,46667  |
| L12 | <i>Candida krusei</i> 600            | 0,00000  | 0,00000  | 0,00000  |
|     | <i>C. inconspicua</i> 601            | 0,00000  | 0,00000  | 0,00000  |

|     |                                      |          |         |         |
|-----|--------------------------------------|----------|---------|---------|
|     | <i>C. parapsilosis</i> 612           | 0,00000  | 0,00000 | 0,00000 |
|     | <i>C. intermedia</i> 622             | 0,00000  | 0,00000 | 0,00000 |
|     | <i>C. apicola</i> 620                | 0,00000  | 0,00000 | 0,00000 |
|     | <i>C. zeylanoides</i> 623            | 0,00000  | 0,00000 | 0,00000 |
|     | <i>C. atlantica</i> 611              | 0,00000  | 0,00000 | 0,00000 |
|     | <i>Trichosporon asahii</i> 624       | 2,06667  | 3,57957 | 2,06667 |
|     | <i>T. domesticum</i> 1062            | 5,50000  | 0,26458 | 0,15275 |
|     | <i>T. coremiiforme</i> 607           | 6,10000  | 0,81854 | 0,47258 |
|     | <i>T. coremiiforme</i> 608           | 5,83333  | 0,90738 | 0,52387 |
|     | <i>Debaryomyces subglobosus</i> 2027 | 0,00000  | 0,00000 | 0,00000 |
|     | <i>D. hansenii</i> 742               | 4,70000  | 4,07308 | 2,35160 |
|     | <i>D. hansenii</i> 615               | 1,73333  | 3,00222 | 1,73333 |
|     | <i>D. hansenii</i> 47                | 5,56667  | 0,75056 | 0,43333 |
|     | <i>Kluyveromyces lactis</i> 1054     | 0,00000  | 0,00000 | 0,00000 |
|     | <i>K. lactis</i> 617                 | 5,56667  | 0,60277 | 0,34801 |
|     | <i>K. marxianus</i> 620              | 6,00000  | 0,70000 | 0,40415 |
|     | <i>K. marxianus</i> 270              | 5,20000  | 0,40000 | 0,23094 |
|     | <i>K. marxianus</i> 258              | 6,26667  | 0,55076 | 0,31798 |
|     | <i>Geotrichum candidum</i> 878       | 0,00000  | 0,00000 | 0,00000 |
|     | <i>G. candidum</i> 870               | 11,20000 | 0,95394 | 0,55076 |
|     | <i>G. candidum</i> 832               | 10,36667 | 0,86217 | 0,49777 |
|     | <i>G. candidum</i> 1053              | 6,63333  | 0,70238 | 0,40552 |
|     | <i>G. candidum</i> 1061              | 7,56667  | 0,65064 | 0,37565 |
| L16 | <i>Candida krusei</i> 600            | 13,01667 | 0,41932 | 0,24210 |
|     | <i>C. inconspicua</i> 601            | 11,18333 | 0,35473 | 0,20480 |
|     | <i>C. parapsilosis</i> 612           | 12,01667 | 0,22546 | 0,13017 |
|     | <i>C. intermedia</i> 622             | 12,73333 | 0,50332 | 0,29059 |
|     | <i>C. apicola</i> 620                | 0,00000  | 0,00000 | 0,00000 |
|     | <i>C. zeylanoides</i> 623            | 7,83333  | 0,32146 | 0,18559 |
|     | <i>C. atlantica</i> 611              | 0,00000  | 0,00000 | 0,00000 |
|     | <i>Trichosporon asahii</i> 624       | 0,00000  | 0,00000 | 0,00000 |
|     | <i>T. domesticum</i> 1062            | 9,16667  | 0,61101 | 0,35277 |
|     | <i>T. coremiiforme</i> 607           | 7,36667  | 0,51316 | 0,29627 |
|     | <i>T. coremiiforme</i> 608           | 6,46667  | 0,30551 | 0,17638 |
|     | <i>Debaryomyces subglobosus</i> 2027 | 0,00000  | 0,00000 | 0,00000 |
|     | <i>D. hansenii</i> 742               | 5,76667  | 0,45092 | 0,26034 |
|     | <i>D. hansenii</i> 615               | 0,00000  | 0,00000 | 0,00000 |
|     | <i>D. hansenii</i> 47                | 5,76667  | 0,55076 | 0,31798 |
|     | <i>Kluyveromyces lactis</i> 1054     | 7,06667  | 1,40475 | 0,81104 |
|     | <i>K. lactis</i> 617                 | 6,20000  | 0,36056 | 0,20817 |
|     | <i>K. marxianus</i> 620              | 10,10000 | 1,41774 | 0,81854 |
|     | <i>K. marxianus</i> 270              | 10,66667 | 0,56862 | 0,32830 |
|     | <i>K. marxianus</i> 258              | 8,66667  | 0,20817 | 0,12019 |
|     | <i>Geotrichum candidum</i> 878       | 8,16667  | 0,58595 | 0,33830 |



|     |                                      |          |         |         |
|-----|--------------------------------------|----------|---------|---------|
|     | <i>G. candidum</i> 870               | 0,00000  | 0,00000 | 0,00000 |
|     | <i>G. candidum</i> 832               | 6,93333  | 1,30512 | 0,75351 |
|     | <i>G. candidum</i> 1053              | 11,36667 | 0,86217 | 0,49777 |
|     | <i>G. candidum</i> 1061              | 11,90000 | 0,95394 | 0,55076 |
| L17 | <i>Candida krusei</i> 600            | 11,60000 | 0,85440 | 0,49329 |
|     | <i>C. inconspicua</i> 601            | 10,85000 | 0,37749 | 0,21794 |
|     | <i>C. parapsilosis</i> 612           | 8,01667  | 0,36171 | 0,20883 |
|     | <i>C. intermedia</i> 622             | 7,73333  | 0,50332 | 0,29059 |
|     | <i>C. apicola</i> 620                | 0,00000  | 0,00000 | 0,00000 |
|     | <i>C. zeylanoides</i> 623            | 8,13333  | 0,40415 | 0,23333 |
|     | <i>C. atlantica</i> 611              | 0,00000  | 0,00000 | 0,00000 |
|     | <i>Trichosporon asahii</i> 624       | 5,91667  | 0,29297 | 0,16915 |
|     | <i>T. domesticum</i> 1062            | 8,00000  | 0,43589 | 0,25166 |
|     | <i>T. coremiiforme</i> 607           | 6,73333  | 0,45092 | 0,26034 |
|     | <i>T. coremiiforme</i> 608           | 6,23333  | 0,45092 | 0,26034 |
|     | <i>Debaryomyces subglobosus</i> 2027 | 0,00000  | 0,00000 | 0,00000 |
|     | <i>D. hansenii</i> 742               | 7,46667  | 0,83267 | 0,48074 |
|     | <i>D. hansenii</i> 615               | 5,96667  | 0,20817 | 0,12019 |
|     | <i>D. hansenii</i> 47                | 7,43333  | 0,70946 | 0,40961 |
|     | <i>Kluyveromyces lactis</i> 1054     | 7,53333  | 0,58595 | 0,33830 |
|     | <i>K. lactis</i> 617                 | 6,38333  | 0,43684 | 0,25221 |
|     | <i>K. marxianus</i> 620              | 7,46667  | 0,37528 | 0,21667 |
|     | <i>K. marxianus</i> 270              | 8,80000  | 0,36056 | 0,20817 |
|     | <i>K. marxianus</i> 258              | 8,53333  | 0,83267 | 0,48074 |
|     | <i>Geotrichum candidum</i> 878       | 15,13333 | 0,40415 | 0,23333 |
|     | <i>G. candidum</i> 870               | 15,08333 | 0,24664 | 0,14240 |
|     | <i>G. candidum</i> 832               | 12,73333 | 0,58595 | 0,33830 |
|     | <i>G. candidum</i> 1053              | 13,76667 | 1,10604 | 0,63857 |
|     | <i>G. candidum</i> 1061              | 15,13333 | 0,37859 | 0,21858 |
| L24 | <i>Candida krusei</i> 600            | 13,98333 | 0,41932 | 0,24210 |
|     | <i>C. inconspicua</i> 601            | 11,76667 | 0,66583 | 0,38442 |
|     | <i>C. parapsilosis</i> 612           | 9,00000  | 0,98489 | 0,56862 |
|     | <i>C. intermedia</i> 622             | 10,13333 | 0,40415 | 0,23333 |
|     | <i>C. apicola</i> 620                | 0,00000  | 0,00000 | 0,00000 |
|     | <i>C. zeylanoides</i> 623            | 8,53333  | 0,70238 | 0,40552 |
|     | <i>C. atlantica</i> 611              | 0,00000  | 0,00000 | 0,00000 |
|     | <i>Trichosporon asahii</i> 624       | 0,00000  | 0,00000 | 0,00000 |
|     | <i>T. domesticum</i> 1062            | 3,33333  | 2,89367 | 1,67066 |
|     | <i>T. coremiiforme</i> 607           | 0,00000  | 0,00000 | 0,00000 |
|     | <i>T. coremiiforme</i> 608           | 0,00000  | 0,00000 | 0,00000 |
|     | <i>Debaryomyces subglobosus</i> 2027 | 0,00000  | 0,00000 | 0,00000 |
|     | <i>D. hansenii</i> 742               | 5,43333  | 0,77675 | 0,44845 |
|     | <i>D. hansenii</i> 615               | 0,00000  | 0,00000 | 0,00000 |
|     | <i>D. hansenii</i> 47                | 7,96667  | 0,49329 | 0,28480 |

|     |                                      |          |         |         |
|-----|--------------------------------------|----------|---------|---------|
|     | <i>Kluyveromyces lactis</i> 1054     | 6,43333  | 1,09697 | 0,63333 |
|     | <i>K. lactis</i> 617                 | 0,00000  | 0,00000 | 0,00000 |
|     | <i>K. marxianus</i> 620              | 0,00000  | 0,00000 | 0,00000 |
|     | <i>K. marxianus</i> 270              | 5,53333  | 0,70238 | 0,40552 |
|     | <i>K. marxianus</i> 258              | 7,43333  | 0,61101 | 0,35277 |
|     | <i>Geotrichum candidum</i> 878       | 5,10000  | 0,26458 | 0,15275 |
|     | <i>G. candidum</i> 870               | 0,00000  | 0,00000 | 0,00000 |
|     | <i>G. candidum</i> 832               | 5,90000  | 1,21244 | 0,70000 |
|     | <i>G. candidum</i> 1053              | 0,00000  | 0,00000 | 0,00000 |
|     | <i>G. candidum</i> 1061              | 0,00000  | 0,00000 | 0,00000 |
| L32 | <i>Candida krusei</i> 600            | 12,76667 | 0,64291 | 0,37118 |
|     | <i>C. inconspicua</i> 601            | 11,46667 | 0,65064 | 0,37565 |
|     | <i>C. parapsilosis</i> 612           | 10,83333 | 0,35119 | 0,20276 |
|     | <i>C. intermedia</i> 622             | 10,10000 | 0,81854 | 0,47258 |
|     | <i>C. apicola</i> 620                | 0,00000  | 0,00000 | 0,00000 |
|     | <i>C. zeylanoides</i> 623            | 8,50000  | 0,10000 | 0,05774 |
|     | <i>C. atlantica</i> 611              | 0,00000  | 0,00000 | 0,00000 |
|     | <i>Trichosporon asahii</i> 624       | 0,00000  | 0,00000 | 0,00000 |
|     | <i>T. domesticum</i> 1062            | 4,50000  | 0,30000 | 0,17321 |
|     | <i>T. coremiiforme</i> 607           | 0,00000  | 0,00000 | 0,00000 |
|     | <i>T. coremiiforme</i> 608           | 0,00000  | 0,00000 | 0,00000 |
|     | <i>Debaryomyces subglobosus</i> 2027 | 0,00000  | 0,00000 | 0,00000 |
|     | <i>D. hansenii</i> 742               | 7,76667  | 0,55076 | 0,31798 |
|     | <i>D. hansenii</i> 615               | 6,53333  | 0,83267 | 0,48074 |
|     | <i>D. hansenii</i> 47                | 8,13333  | 0,56862 | 0,32830 |
|     | <i>Kluyveromyces lactis</i> 1054     | 5,23333  | 0,45092 | 0,26034 |
|     | <i>K. lactis</i> 617                 | 0,00000  | 0,00000 | 0,00000 |
|     | <i>K. marxianus</i> 620              | 0,00000  | 0,00000 | 0,00000 |
|     | <i>K. marxianus</i> 270              | 6,70000  | 0,55678 | 0,32146 |
|     | <i>K. marxianus</i> 258              | 5,33333  | 0,32146 | 0,18559 |
|     | <i>Geotrichum candidum</i> 878       | 0,00000  | 0,00000 | 0,00000 |
|     | <i>G. candidum</i> 870               | 0,00000  | 0,00000 | 0,00000 |
|     | <i>G. candidum</i> 832               | 5,26667  | 0,45092 | 0,26034 |
|     | <i>G. candidum</i> 1053              | 5,36667  | 0,30551 | 0,17638 |
|     | <i>G. candidum</i> 1061              | 0,00000  | 0,00000 | 0,00000 |
| 381 | <i>Candida krusei</i> 600            | 11,63333 | 0,45092 | 0,26034 |
|     | <i>C. inconspicua</i> 601            | 10,26667 | 0,58595 | 0,33830 |
|     | <i>C. parapsilosis</i> 612           | 12,26667 | 0,50332 | 0,29059 |
|     | <i>C. intermedia</i> 622             | 12,43333 | 0,40415 | 0,23333 |
|     | <i>C. apicola</i> 620                | 10,43333 | 0,40415 | 0,23333 |
|     | <i>C. zeylanoides</i> 623            | 8,56667  | 2,10079 | 1,21289 |
|     | <i>C. atlantica</i> 611              | 10,30000 | 0,62450 | 0,36056 |
|     | <i>Trichosporon asahii</i> 624       | 0,00000  | 0,00000 | 0,00000 |
|     | <i>T. domesticum</i> 1062            | 0,00000  | 0,00000 | 0,00000 |

|     |                                      |          |         |         |
|-----|--------------------------------------|----------|---------|---------|
|     | <i>T. coremiiforme</i> 607           | 0,00000  | 0,00000 | 0,00000 |
|     | <i>T. coremiiforme</i> 608           | 0,00000  | 0,00000 | 0,00000 |
|     | <i>Debaryomyces subglobosus</i> 2027 | 0,00000  | 0,00000 | 0,00000 |
|     | <i>D. hansenii</i> 742               | 3,66667  | 3,18172 | 1,83697 |
|     | <i>D. hansenii</i> 615               | 5,50000  | 0,75498 | 0,43589 |
|     | <i>D. hansenii</i> 47                | 6,76667  | 1,78979 | 1,03333 |
|     | <i>Kluyveromyces lactis</i> 1054     | 7,40000  | 1,63707 | 0,94516 |
|     | <i>K. lactis</i> 617                 | 2,73333  | 4,73427 | 2,73333 |
|     | <i>K. marxianus</i> 620              | 0,00000  | 0,00000 | 0,00000 |
|     | <i>K. marxianus</i> 270              | 5,76667  | 1,34288 | 0,77531 |
|     | <i>K. marxianus</i> 258              | 6,63333  | 0,15275 | 0,08819 |
|     | <i>Geotrichum candidum</i> 878       | 5,16667  | 0,35119 | 0,20276 |
|     | <i>G. candidum</i> 870               | 0,00000  | 0,00000 | 0,00000 |
|     | <i>G. candidum</i> 832               | 6,76667  | 0,45092 | 0,26034 |
|     | <i>G. candidum</i> 1053              | 4,76667  | 0,37859 | 0,21858 |
|     | <i>G. candidum</i> 1061              | 0,00000  | 0,00000 | 0,00000 |
| 383 | <i>Candida krusei</i> 600            | 12,53333 | 0,25166 | 0,14530 |
|     | <i>C. inconspicua</i> 601            | 11,30000 | 0,43589 | 0,25166 |
|     | <i>C. parapsilosis</i> 612           | 13,23333 | 0,60277 | 0,34801 |
|     | <i>C. intermedia</i> 622             | 12,53333 | 0,25166 | 0,14530 |
|     | <i>C. apicola</i> 620                | 11,41667 | 0,45369 | 0,26194 |
|     | <i>C. zeylanoides</i> 623            | 8,26667  | 0,58595 | 0,33830 |
|     | <i>C. atlantica</i> 611              | 7,10000  | 0,75498 | 0,43589 |
|     | <i>Trichosporon asahii</i> 624       | 0,00000  | 0,00000 | 0,00000 |
|     | <i>T. domesticum</i> 1062            | 0,00000  | 0,00000 | 0,00000 |
|     | <i>T. coremiiforme</i> 607           | 4,53333  | 0,66583 | 0,38442 |
|     | <i>T. coremiiforme</i> 608           | 0,00000  | 0,00000 | 0,00000 |
|     | <i>Debaryomyces subglobosus</i> 2027 | 1,76667  | 3,05996 | 1,76667 |
|     | <i>D. hansenii</i> 742               | 3,66667  | 3,25167 | 1,87735 |
|     | <i>D. hansenii</i> 615               | 1,33333  | 2,30940 | 1,33333 |
|     | <i>D. hansenii</i> 47                | 5,83333  | 1,45717 | 0,84130 |
|     | <i>Kluyveromyces lactis</i> 1054     | 9,13333  | 0,92916 | 0,53645 |
|     | <i>K. lactis</i> 617                 | 5,63667  | 0,53575 | 0,30932 |
|     | <i>K. marxianus</i> 620              | 0,00000  | 0,00000 | 0,00000 |
|     | <i>K. marxianus</i> 270              | 5,56667  | 1,09697 | 0,63333 |
|     | <i>K. marxianus</i> 258              | 6,03333  | 1,07858 | 0,62272 |
|     | <i>Geotrichum candidum</i> 878       | 4,86667  | 0,58595 | 0,33830 |
|     | <i>G. candidum</i> 870               | 0,00000  | 0,00000 | 0,00000 |
|     | <i>G. candidum</i> 832               | 5,10000  | 0,81854 | 0,47258 |
|     | <i>G. candidum</i> 1053              | 0,00000  | 0,00000 | 0,00000 |
|     | <i>G. candidum</i> 1061              | 0,00000  | 0,00000 | 0,00000 |
| 384 | <i>Candida krusei</i> 600            | 12,93333 | 0,51316 | 0,29627 |
|     | <i>C. inconspicua</i> 601            | 11,73333 | 0,45092 | 0,26034 |
|     | <i>C. parapsilosis</i> 612           | 13,21667 | 0,40104 | 0,23154 |

|     |                                      |          |         |         |
|-----|--------------------------------------|----------|---------|---------|
|     | <i>C. intermedia</i> 622             | 12,63333 | 0,49329 | 0,28480 |
|     | <i>C. apicola</i> 620                | 15,06667 | 0,64291 | 0,37118 |
|     | <i>C. zeylanoides</i> 623            | 8,10000  | 0,55678 | 0,32146 |
|     | <i>C. atlantica</i> 611              | 10,70000 | 0,17321 | 0,10000 |
|     | <i>Trichosporon asahii</i> 624       | 0,00000  | 0,00000 | 0,00000 |
|     | <i>T. domesticum</i> 1062            | 6,00000  | 2,02978 | 1,17189 |
|     | <i>T. coremiiforme</i> 607           | 4,96667  | 0,58595 | 0,33830 |
|     | <i>T. coremiiforme</i> 608           | 0,00000  | 0,00000 | 0,00000 |
|     | <i>Debaryomyces subglobosus</i> 2027 | 0,00000  | 0,00000 | 0,00000 |
|     | <i>D. hansenii</i> 742               | 5,16667  | 0,32146 | 0,18559 |
|     | <i>D. hansenii</i> 615               | 0,00000  | 0,00000 | 0,00000 |
|     | <i>D. hansenii</i> 47                | 5,43333  | 1,09697 | 0,63333 |
|     | <i>Kluyveromyces lactis</i> 1054     | 8,33333  | 1,02632 | 0,59255 |
|     | <i>K. lactis</i> 617                 | 0,00000  | 0,00000 | 0,00000 |
|     | <i>K. marxianus</i> 620              | 0,00000  | 0,00000 | 0,00000 |
|     | <i>K. marxianus</i> 270              | 4,66667  | 0,80829 | 0,46667 |
|     | <i>K. marxianus</i> 258              | 0,00000  | 0,00000 | 0,00000 |
|     | <i>Geotrichum candidum</i> 878       | 0,00000  | 0,00000 | 0,00000 |
|     | <i>G. candidum</i> 870               | 0,00000  | 0,00000 | 0,00000 |
|     | <i>G. candidum</i> 832               | 5,10000  | 0,26458 | 0,15275 |
|     | <i>G. candidum</i> 1053              | 0,00000  | 0,00000 | 0,00000 |
|     | <i>G. candidum</i> 1061              | 0,00000  | 0,00000 | 0,00000 |
| 391 | <i>Candida krusei</i> 600            | 12,21667 | 0,40104 | 0,23154 |
|     | <i>C. inconspicua</i> 601            | 11,76667 | 0,45092 | 0,26034 |
|     | <i>C. parapsilosis</i> 612           | 12,33333 | 0,50332 | 0,29059 |
|     | <i>C. intermedia</i> 622             | 12,90000 | 0,45826 | 0,26458 |
|     | <i>C. apicola</i> 620                | 10,43333 | 0,32146 | 0,18559 |
|     | <i>C. zeylanoides</i> 623            | 9,26667  | 1,06927 | 0,61734 |
|     | <i>C. atlantica</i> 611              | 10,83333 | 0,65064 | 0,37565 |
|     | <i>Trichosporon asahii</i> 624       | 0,00000  | 0,00000 | 0,00000 |
|     | <i>T. domesticum</i> 1062            | 4,86667  | 0,58595 | 0,33830 |
|     | <i>T. coremiiforme</i> 607           | 0,00000  | 0,00000 | 0,00000 |
|     | <i>T. coremiiforme</i> 608           | 0,00000  | 0,00000 | 0,00000 |
|     | <i>Debaryomyces subglobosus</i> 2027 | 0,00000  | 0,00000 | 0,00000 |
|     | <i>D. hansenii</i> 742               | 8,20000  | 0,79373 | 0,45826 |
|     | <i>D. hansenii</i> 615               | 7,16667  | 0,41633 | 0,24037 |
|     | <i>D. hansenii</i> 47                | 7,93333  | 0,58595 | 0,33830 |
|     | <i>Kluyveromyces lactis</i> 1054     | 10,96667 | 0,66583 | 0,38442 |
|     | <i>K. lactis</i> 617                 | 7,00000  | 0,43589 | 0,25166 |
|     | <i>K. marxianus</i> 620              | 6,86667  | 0,40415 | 0,23333 |
|     | <i>K. marxianus</i> 270              | 7,80000  | 0,87178 | 0,50332 |
|     | <i>K. marxianus</i> 258              | 9,86667  | 0,30551 | 0,17638 |
|     | <i>Geotrichum candidum</i> 878       | 6,26667  | 0,98658 | 0,56960 |
|     | <i>G. candidum</i> 870               | 0,00000  | 0,00000 | 0,00000 |

|       |                                      |          |         |         |
|-------|--------------------------------------|----------|---------|---------|
|       | <i>G. candidum</i> 832               | 5,76667  | 0,55076 | 0,31798 |
|       | <i>G. candidum</i> 1053              | 0,00000  | 0,00000 | 0,00000 |
|       | <i>G. candidum</i> 1061              | 0,00000  | 0,00000 | 0,00000 |
| 387   | <i>Candida krusei</i> 600            | 12,33333 | 0,45092 | 0,26034 |
|       | <i>C. inconspicua</i> 601            | 11,26667 | 0,50332 | 0,29059 |
|       | <i>C. parapsilosis</i> 612           | 12,73333 | 0,40415 | 0,23333 |
|       | <i>C. intermedia</i> 622             | 12,63333 | 0,28868 | 0,16667 |
|       | <i>C. apicola</i> 620                | 10,53333 | 0,30551 | 0,17638 |
|       | <i>C. zeylanoides</i> 623            | 9,23333  | 0,83865 | 0,48419 |
|       | <i>C. atlantica</i> 611              | 10,70000 | 0,17321 | 0,10000 |
|       | <i>Trichosporon asahii</i> 624       | 0,00000  | 0,00000 | 0,00000 |
|       | <i>T. domesticum</i> 1062            | 5,26667  | 0,30551 | 0,17638 |
|       | <i>T. coremiiforme</i> 607           | 0,00000  | 0,00000 | 0,00000 |
|       | <i>T. coremiiforme</i> 608           | 0,00000  | 0,00000 | 0,00000 |
|       | <i>Debaryomyces subglobosus</i> 2027 | 0,00000  | 0,00000 | 0,00000 |
|       | <i>D. hansenii</i> 742               | 7,06667  | 1,33167 | 0,76884 |
|       | <i>D. hansenii</i> 615               | 5,30000  | 0,10000 | 0,05774 |
|       | <i>D. hansenii</i> 47                | 9,76667  | 1,78979 | 1,03333 |
|       | <i>Kluyveromyces lactis</i> 1054     | 10,96667 | 0,66583 | 0,38442 |
|       | <i>K. lactis</i> 617                 | 6,53333  | 0,75056 | 0,43333 |
|       | <i>K. marxianus</i> 620              | 0,00000  | 0,00000 | 0,00000 |
|       | <i>K. marxianus</i> 270              | 4,76667  | 0,55076 | 0,31798 |
|       | <i>K. marxianus</i> 258              | 5,46667  | 0,25166 | 0,14530 |
|       | <i>Geotrichum candidum</i> 878       | 6,66667  | 0,15275 | 0,08819 |
|       | <i>G. candidum</i> 870               | 0,00000  | 0,00000 | 0,00000 |
|       | <i>G. candidum</i> 832               | 0,00000  | 0,00000 | 0,00000 |
|       | <i>G. candidum</i> 1053              | 0,00000  | 0,00000 | 0,00000 |
|       | <i>G. candidum</i> 1061              | 0,00000  | 0,00000 | 0,00000 |
| K19-1 | <i>Candida krusei</i> 600            | 5,53333  | 0,61101 | 0,35277 |
|       | <i>C. inconspicua</i> 601            | 6,10000  | 0,81854 | 0,47258 |
|       | <i>C. parapsilosis</i> 612           | 5,73333  | 0,50332 | 0,29059 |
|       | <i>C. intermedia</i> 622             | 5,50000  | 0,30000 | 0,17321 |
|       | <i>C. apicola</i> 620                | 0,00000  | 0,00000 | 0,00000 |
|       | <i>C. zeylanoides</i> 623            | 5,96667  | 0,66583 | 0,38442 |
|       | <i>C. atlantica</i> 611              | 0,00000  | 0,00000 | 0,00000 |
|       | <i>Trichosporon asahii</i> 624       | 0,00000  | 0,00000 | 0,00000 |
|       | <i>T. domesticum</i> 1062            | 9,66667  | 0,72169 | 0,41667 |
|       | <i>T. coremiiforme</i> 607           | 10,73333 | 0,45092 | 0,26034 |
|       | <i>T. coremiiforme</i> 608           | 10,33333 | 0,15275 | 0,08819 |
|       | <i>Debaryomyces subglobosus</i> 2027 | 0,00000  | 0,00000 | 0,00000 |
|       | <i>D. hansenii</i> 742               | 5,30000  | 0,55678 | 0,32146 |
|       | <i>D. hansenii</i> 615               | 6,50000  | 0,88882 | 0,51316 |
|       | <i>D. hansenii</i> 47                | 0,00000  | 0,00000 | 0,00000 |
|       | <i>Kluyveromyces lactis</i> 1054     | 6,76667  | 0,45092 | 0,26034 |

|       |                                      |          |         |         |
|-------|--------------------------------------|----------|---------|---------|
|       | <i>K. lactis</i> 617                 | 5,36667  | 0,28868 | 0,16667 |
|       | <i>K. marxianus</i> 620              | 5,30000  | 0,10000 | 0,05774 |
|       | <i>K. marxianus</i> 270              | 6,26667  | 0,55076 | 0,31798 |
|       | <i>K. marxianus</i> 258              | 5,43333  | 0,25166 | 0,14530 |
|       | <i>Geotrichum candidum</i> 878       | 6,11667  | 0,79110 | 0,45674 |
|       | <i>G. candidum</i> 870               | 5,60000  | 0,36056 | 0,20817 |
|       | <i>G. candidum</i> 832               | 7,06667  | 0,70946 | 0,40961 |
|       | <i>G. candidum</i> 1053              | 5,40000  | 0,10000 | 0,05774 |
|       | <i>G. candidum</i> 1061              | 0,00000  | 0,00000 | 0,00000 |
| K19-2 | <i>Candida krusei</i> 600            | 10,33333 | 0,15275 | 0,08819 |
|       | <i>C. inconspicua</i> 601            | 0,00000  | 0,00000 | 0,00000 |
|       | <i>C. parapsilosis</i> 612           | 0,00000  | 0,00000 | 0,00000 |
|       | <i>C. intermedia</i> 622             | 0,00000  | 0,00000 | 0,00000 |
|       | <i>C. apicola</i> 620                | 0,00000  | 0,00000 | 0,00000 |
|       | <i>C. zeylanoides</i> 623            | 7,86667  | 0,30551 | 0,17638 |
|       | <i>C. atlantica</i> 611              | 0,00000  | 0,00000 | 0,00000 |
|       | <i>Trichosporon asahii</i> 624       | 0,00000  | 0,00000 | 0,00000 |
|       | <i>T. domesticum</i> 1062            | 8,31667  | 0,35473 | 0,20480 |
|       | <i>T. coremiiforme</i> 607           | 8,40000  | 0,81854 | 0,47258 |
|       | <i>T. coremiiforme</i> 608           | 8,16667  | 0,49329 | 0,28480 |
|       | <i>Debaryomyces subglobosus</i> 2027 | 0,00000  | 0,00000 | 0,00000 |
|       | <i>D. hansenii</i> 742               | 5,10000  | 0,75498 | 0,43589 |
|       | <i>D. hansenii</i> 615               | 4,43333  | 0,40415 | 0,23333 |
|       | <i>D. hansenii</i> 47                | 5,40000  | 0,26458 | 0,15275 |
|       | <i>Kluyveromyces lactis</i> 1054     | 9,00000  | 1,37477 | 0,79373 |
|       | <i>K. lactis</i> 617                 | 8,40000  | 0,10000 | 0,05774 |
|       | <i>K. marxianus</i> 620              | 8,13333  | 0,56862 | 0,32830 |
|       | <i>K. marxianus</i> 270              | 8,83333  | 0,32146 | 0,18559 |
|       | <i>K. marxianus</i> 258              | 8,86667  | 0,35119 | 0,20276 |
|       | <i>Geotrichum candidum</i> 878       | 5,10000  | 0,55678 | 0,32146 |
|       | <i>G. candidum</i> 870               | 0,00000  | 0,00000 | 0,00000 |
|       | <i>G. candidum</i> 832               | 5,10000  | 0,81854 | 0,47258 |
|       | <i>G. candidum</i> 1053              | 0,00000  | 0,00000 | 0,00000 |
|       | <i>G. candidum</i> 1061              | 0,00000  | 0,00000 | 0,00000 |
| K19-3 | <i>Candida krusei</i> 600            | 0,00000  | 0,00000 | 0,00000 |
|       | <i>C. inconspicua</i> 601            | 0,00000  | 0,00000 | 0,00000 |
|       | <i>C. parapsilosis</i> 612           | 0,00000  | 0,00000 | 0,00000 |
|       | <i>C. intermedia</i> 622             | 8,40000  | 0,26458 | 0,15275 |
|       | <i>C. apicola</i> 620                | 0,00000  | 0,00000 | 0,00000 |
|       | <i>C. zeylanoides</i> 623            | 0,00000  | 0,00000 | 0,00000 |
|       | <i>C. atlantica</i> 611              | 0,00000  | 0,00000 | 0,00000 |
|       | <i>Trichosporon asahii</i> 624       | 0,00000  | 0,00000 | 0,00000 |
|       | <i>T. domesticum</i> 1062            | 5,13333  | 0,56862 | 0,32830 |
|       | <i>T. coremiiforme</i> 607           | 4,70000  | 3,90000 | 2,25167 |

|       |                                      |          |         |         |
|-------|--------------------------------------|----------|---------|---------|
|       | <i>T. coremiiforme</i> 608           | 7,65667  | 0,55194 | 0,31866 |
|       | <i>Debaryomyces subglobosus</i> 2027 | 0,00000  | 0,00000 | 0,00000 |
|       | <i>D. hansenii</i> 742               | 0,00000  | 0,00000 | 0,00000 |
|       | <i>D. hansenii</i> 615               | 0,00000  | 0,00000 | 0,00000 |
|       | <i>D. hansenii</i> 47                | 6,33333  | 1,15036 | 0,66416 |
|       | <i>Kluyveromyces lactis</i> 1054     | 6,76667  | 1,26623 | 0,73106 |
|       | <i>K. lactis</i> 617                 | 6,40000  | 2,00749 | 1,15902 |
|       | <i>K. marxianus</i> 620              | 5,60000  | 0,26458 | 0,15275 |
|       | <i>K. marxianus</i> 270              | 6,76667  | 0,55076 | 0,31798 |
|       | <i>K. marxianus</i> 258              | 6,46667  | 1,25033 | 0,72188 |
|       | <i>Geotrichum candidum</i> 878       | 7,66667  | 0,47258 | 0,27285 |
|       | <i>G. candidum</i> 870               | 0,00000  | 0,00000 | 0,00000 |
|       | <i>G. candidum</i> 832               | 6,10000  | 0,75498 | 0,43589 |
|       | <i>G. candidum</i> 1053              | 0,00000  | 0,00000 | 0,00000 |
|       | <i>G. candidum</i> 1061              | 0,00000  | 0,00000 | 0,00000 |
| K20-4 | <i>Candida krusei</i> 600            | 14,11667 | 0,27538 | 0,15899 |
|       | <i>C. inconspicua</i> 601            | 11,83333 | 0,35119 | 0,20276 |
|       | <i>C. parapsilosis</i> 612           | 10,23333 | 0,25166 | 0,14530 |
|       | <i>C. intermedia</i> 622             | 14,90000 | 0,36056 | 0,20817 |
|       | <i>C. apicola</i> 620                | 0,00000  | 0,00000 | 0,00000 |
|       | <i>C. zeylanoides</i> 623            | 6,43333  | 0,72342 | 0,41767 |
|       | <i>C. atlantica</i> 611              | 0,00000  | 0,00000 | 0,00000 |
|       | <i>Trichosporon asahii</i> 624       | 0,00000  | 0,00000 | 0,00000 |
|       | <i>T. domesticum</i> 1062            | 9,58333  | 0,53463 | 0,30867 |
|       | <i>T. coremiiforme</i> 607           | 6,76667  | 0,45092 | 0,26034 |
|       | <i>T. coremiiforme</i> 608           | 7,26667  | 0,68069 | 0,39299 |
|       | <i>Debaryomyces subglobosus</i> 2027 | 0,00000  | 0,00000 | 0,00000 |
|       | <i>D. hansenii</i> 742               | 5,91667  | 0,24664 | 0,14240 |
|       | <i>D. hansenii</i> 615               | 0,00000  | 0,00000 | 0,00000 |
|       | <i>D. hansenii</i> 47                | 7,23333  | 0,95044 | 0,54874 |
|       | <i>Kluyveromyces lactis</i> 1054     | 9,43333  | 0,80208 | 0,46308 |
|       | <i>K. lactis</i> 617                 | 11,16667 | 0,61101 | 0,35277 |
|       | <i>K. marxianus</i> 620              | 11,80000 | 0,50000 | 0,28868 |
|       | <i>K. marxianus</i> 270              | 12,40000 | 0,10000 | 0,05774 |
|       | <i>K. marxianus</i> 258              | 11,50000 | 1,11355 | 0,64291 |
|       | <i>Geotrichum candidum</i> 878       | 12,70000 | 0,55678 | 0,32146 |
|       | <i>G. candidum</i> 870               | 12,30000 | 0,43589 | 0,25166 |
|       | <i>G. candidum</i> 832               | 11,83333 | 0,25166 | 0,14530 |
|       | <i>G. candidum</i> 1053              | 10,33333 | 0,15275 | 0,08819 |
|       | <i>G. candidum</i> 1061              | 10,73333 | 0,41633 | 0,24037 |
| 3018  | <i>Candida krusei</i> 600            | 10,16667 | 0,35119 | 0,20276 |
|       | <i>C. inconspicua</i> 601            | 10,43333 | 0,80208 | 0,46308 |
|       | <i>C. parapsilosis</i> 612           | 0,00000  | 0,00000 | 0,00000 |
|       | <i>C. intermedia</i> 622             | 0,00000  | 0,00000 | 0,00000 |

|          |                                      |          |         |         |
|----------|--------------------------------------|----------|---------|---------|
|          | <i>C. apicola</i> 620                | 0,00000  | 0,00000 | 0,00000 |
|          | <i>C. zeylanoides</i> 623            | 7,66667  | 0,47258 | 0,27285 |
|          | <i>C. atlantica</i> 611              | 0,00000  | 0,00000 | 0,00000 |
|          | <i>Trichosporon asahii</i> 624       | 0,00000  | 0,00000 | 0,00000 |
|          | <i>T. domesticum</i> 1062            | 0,00000  | 0,00000 | 0,00000 |
|          | <i>T. coremiiforme</i> 607           | 0,00000  | 0,00000 | 0,00000 |
|          | <i>T. coremiiforme</i> 608           | 0,00000  | 0,00000 | 0,00000 |
|          | <i>Debaryomyces subglobosus</i> 2027 | 0,00000  | 0,00000 | 0,00000 |
|          | <i>D. hansenii</i> 742               | 5,50000  | 0,26458 | 0,15275 |
|          | <i>D. hansenii</i> 615               | 0,00000  | 0,00000 | 0,00000 |
|          | <i>D. hansenii</i> 47                | 5,83333  | 0,61101 | 0,35277 |
|          | <i>Kluyveromyces lactis</i> 1054     | 5,70000  | 1,15326 | 0,66583 |
|          | <i>K. lactis</i> 617                 | 0,00000  | 0,00000 | 0,00000 |
|          | <i>K. marxianus</i> 620              | 0,00000  | 0,00000 | 0,00000 |
|          | <i>K. marxianus</i> 270              | 0,00000  | 0,00000 | 0,00000 |
|          | <i>K. marxianus</i> 258              | 0,00000  | 0,00000 | 0,00000 |
|          | <i>Geotrichum candidum</i> 878       | 5,13333  | 0,30551 | 0,17638 |
|          | <i>G. candidum</i> 870               | 0,00000  | 0,00000 | 0,00000 |
|          | <i>G. candidum</i> 832               | 0,00000  | 0,00000 | 0,00000 |
|          | <i>G. candidum</i> 1053              | 0,00000  | 0,00000 | 0,00000 |
|          | <i>G. candidum</i> 1061              | 3,76667  | 6,52406 | 3,76667 |
| controls | <i>Candida krusei</i> 600            | 17,03333 | 0,40415 | 0,23333 |
|          | <i>C. inconspicua</i> 601            | 16,30000 | 0,10000 | 0,05774 |
|          | <i>C. parapsilosis</i> 612           | 15,70000 | 0,10000 | 0,05774 |
|          | <i>C. intermedia</i> 622             | 15,30000 | 0,10000 | 0,05774 |
|          | <i>C. apicola</i> 620                | 14,60000 | 0,26458 | 0,15275 |
|          | <i>C. zeylanoides</i> 623            | 21,13333 | 0,28868 | 0,16667 |
|          | <i>C. atlantica</i> 611              | 17,26667 | 0,05774 | 0,03333 |
|          | <i>Trichosporon asahii</i> 624       | 21,50000 | 0,26458 | 0,15275 |
|          | <i>T. domesticum</i> 1062            | 15,66667 | 0,55076 | 0,31798 |
|          | <i>T. coremiiforme</i> 607           | 16,66667 | 0,15275 | 0,08819 |
|          | <i>T. coremiiforme</i> 608           | 20,50000 | 0,20000 | 0,11547 |
|          | <i>Debaryomyces subglobosus</i> 2027 | 14,96667 | 0,56862 | 0,32830 |
|          | <i>D. hansenii</i> 742               | 16,10000 | 0,26458 | 0,15275 |
|          | <i>D. hansenii</i> 615               | 15,36667 | 0,49329 | 0,28480 |
|          | <i>D. hansenii</i> 47                | 18,36667 | 0,51316 | 0,29627 |
|          | <i>Kluyveromyces lactis</i> 1054     | 21,16667 | 1,15902 | 0,66916 |
|          | <i>K. lactis</i> 617                 | 18,66667 | 0,15275 | 0,08819 |
|          | <i>K. marxianus</i> 620              | 20,20000 | 0,36056 | 0,20817 |
|          | <i>K. marxianus</i> 270              | 19,63333 | 1,00664 | 0,58119 |
|          | <i>K. marxianus</i> 258              | 20,80000 | 0,43589 | 0,25166 |
|          | <i>Geotrichum candidum</i> 878       | 20,30000 | 0,20000 | 0,11547 |
|          | <i>G. candidum</i> 870               | 20,53333 | 0,80208 | 0,46308 |
|          | <i>G. candidum</i> 832               | 18,96667 | 2,14554 | 1,23873 |



|  |                         |          |         |         |
|--|-------------------------|----------|---------|---------|
|  | <i>G. candidum</i> 1053 | 15,56667 | 0,32146 | 0,18559 |
|  | <i>G. candidum</i> 1061 | 15,56667 | 0,55076 | 0,31798 |
